# Supplementary material for: Micronuclei from misaligned chromosomes that satisfy the spindle assembly checkpoint in cancer cells
Source: PubMed Central journal article supplement — Curr Biol. 2022 Oct 10;32(19):4240–4254.e5. doi: 10.1016/j.cub.2022.08.026 (PMC9559752; doi:10.1016/j.cub.2022.08.026), 2022-10-10
Supplement: mmc1.pdf [file mmc1.pdf]

**Current Biology, Volume 32**

**Supplemental Information**

**Micronuclei from misaligned chromosomes  
that satisfy the spindle assembly  
checkpoint in cancer cells**

**Ana Margarida Gomes, Bernardo Orr, Marco Novais-Cruz, Filipe De Sousa, Joana Macário-Monteiro, Carolina Lemos, Cristina Ferrás, and Helder Maiato**

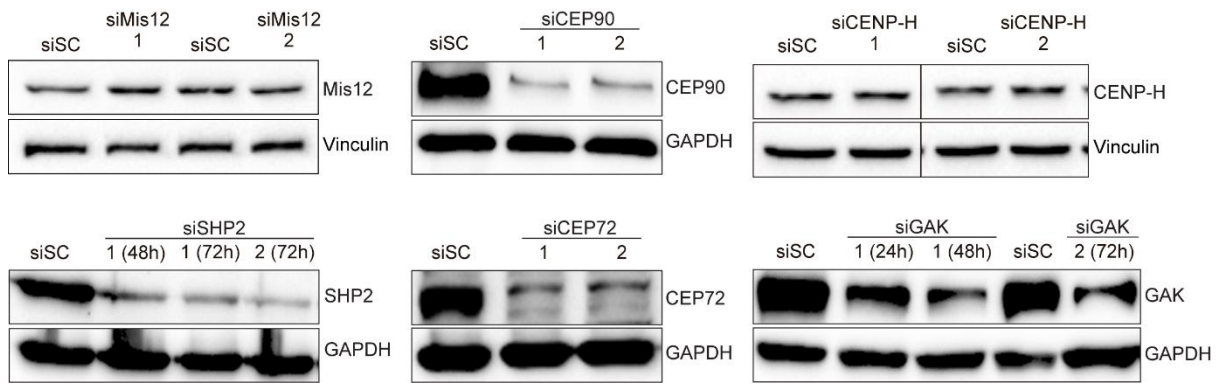

**Figure S1. Identification of off-targets, related to Figure 1.** Protein lysates obtained after RNAi treatment were immunoblotted with an antibody specific for each protein of interest (Mis12, CEP90, CENP-H, SHP2, CEP72 and GAK, upper bands). The bottom band corresponds to antibody detection of GAPDH or Vinculin, which were used as loading controls.

**A** H2B-GFP mRFP- $\alpha$ -tubulin

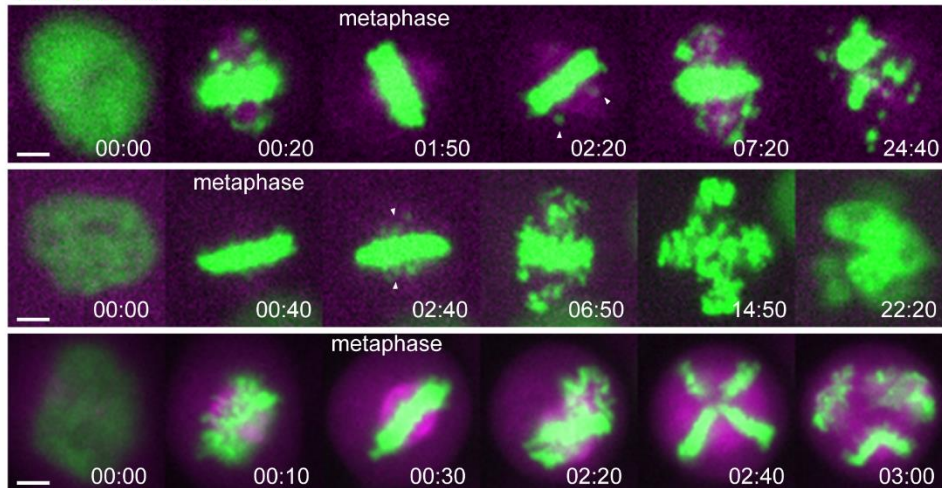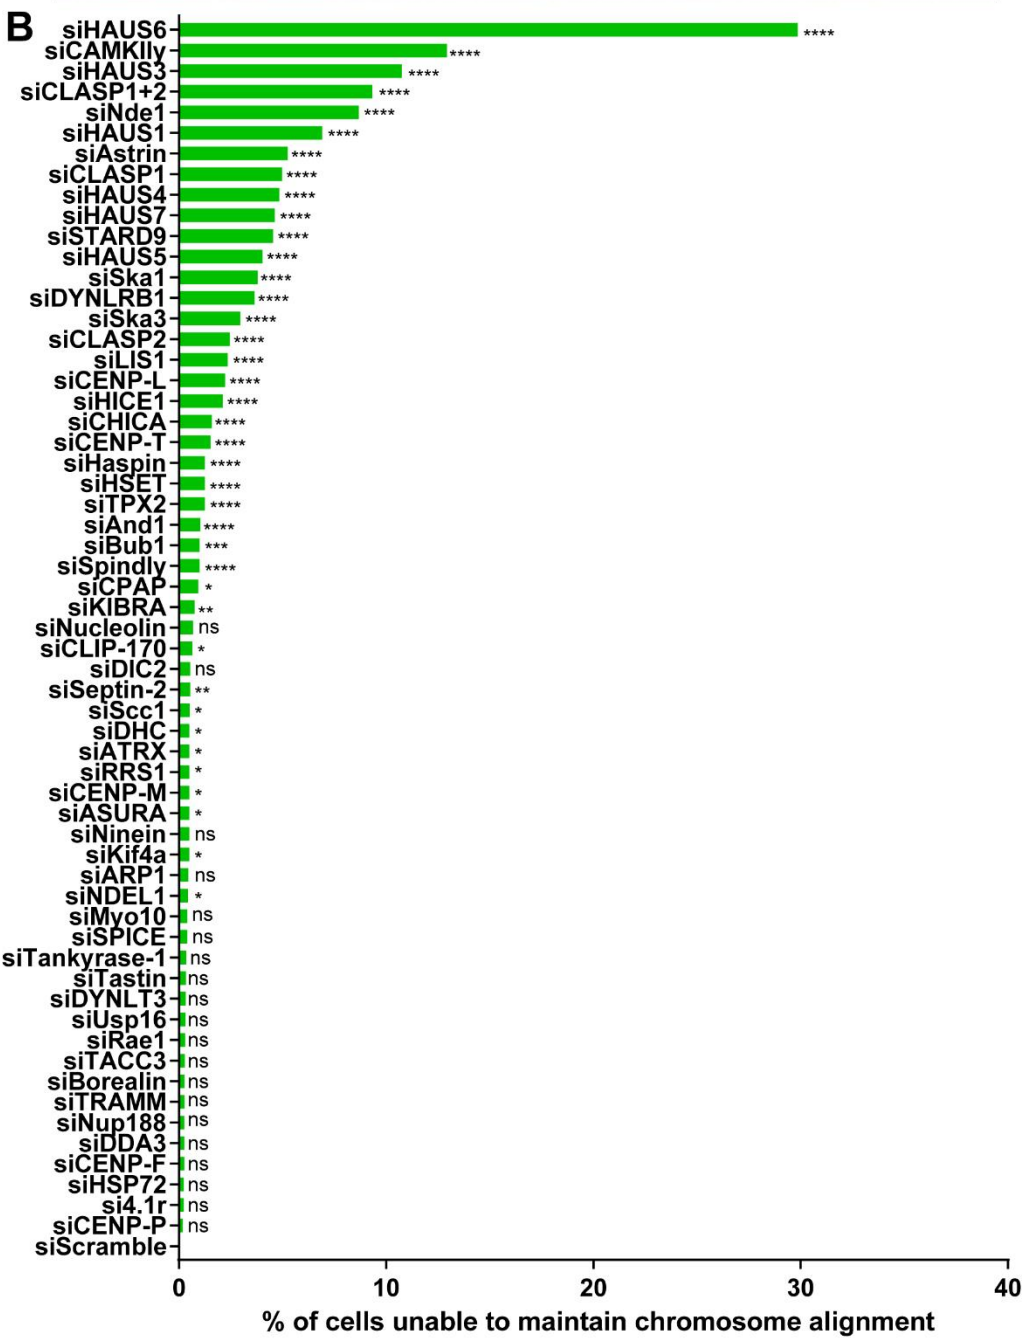

**Figure S2. In addition to chromosome alignment defects, some genetic conditions also compromise the maintenance of chromosome alignment at the metaphase plate, related to Figure 2. a)** Examples of time-lapse sequences illustrating the three main mitotic phenotypes of chromosome alignment maintenance defects observed: 1) cells showed a prolonged delay in chromosome alignment but eventually completed congression, after which chromosomes/chromatids underwent gradual scattering from the metaphase plate; 2) chromosomes aligned normally at the metaphase plate, but then underwent gradual scattering; 3) chromosomes aligned normally at the metaphase plate, followed by spindle pole fragmentation and chromosome scattering. Arrows indicate scattered chromosomes/chromatids in cells that were unable to maintain chromosome alignment at the metaphase plate. Scale bar = 5  $\mu$ m. Time: h:min, from nuclear envelope breakdown (NEB) to cell death or mitotic exit. **b)** Frequency of cells exhibiting problems in the maintenance of chromosome alignment at the metaphase plate. Only the conditions exhibiting problems in the maintenance of chromosome alignment were included. At least 2 independent experiments were analyzed. The total number of cells analyzed for each condition is indicated in Table S1. (\* $p \leq 0.05$ , \*\* $p \leq 0.01$ , \*\*\* $p \leq 0.001$ , \*\*\*\* $p \leq 0.0001$ , ns corresponds to not significantly different from control, Fisher's exact two-tailed test).

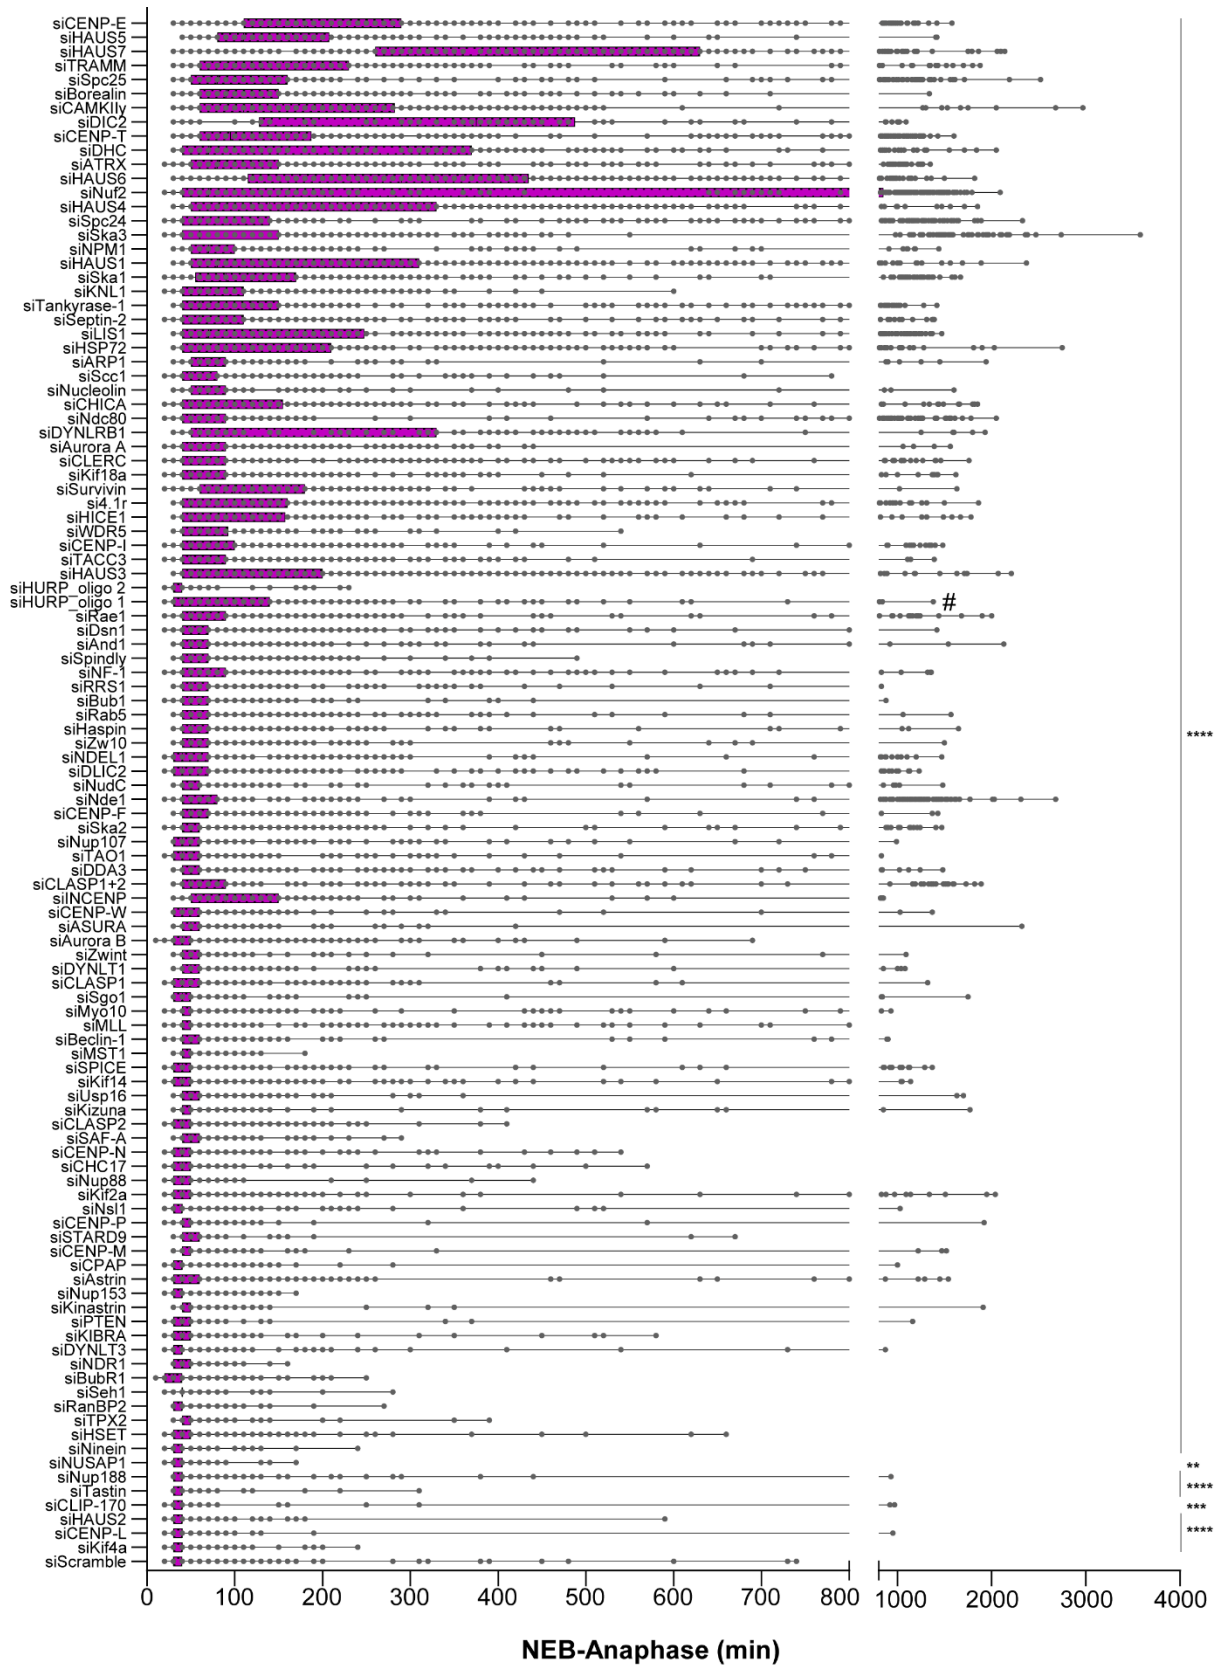

**Figure S3. Mitotic duration upon gene-specific RNAi-mediated depletion, related to Figure 3.** HeLa cells stably expressing H2B-GFP and  $\alpha$ -tubulin-mRFP were

acquired every 10 minutes. Mitotic duration was determined by measuring the time between nuclear envelope breakdown (NEB) and anaphase onset, shown in minutes. Data was presented as box-and-whiskers and each point corresponds to one cell. The difference between mean values of each RNAi condition was statistically significant from the control mean values. At least 2 independent experiments per condition were performed. (\* $p \leq 0.05$ , \*\* $p \leq 0.01$ , \*\*\* $p \leq 0.001$ , \*\*\*\* $p \leq 0.0001$ , ns corresponds to not significantly different from control, Mann-Whitney test).

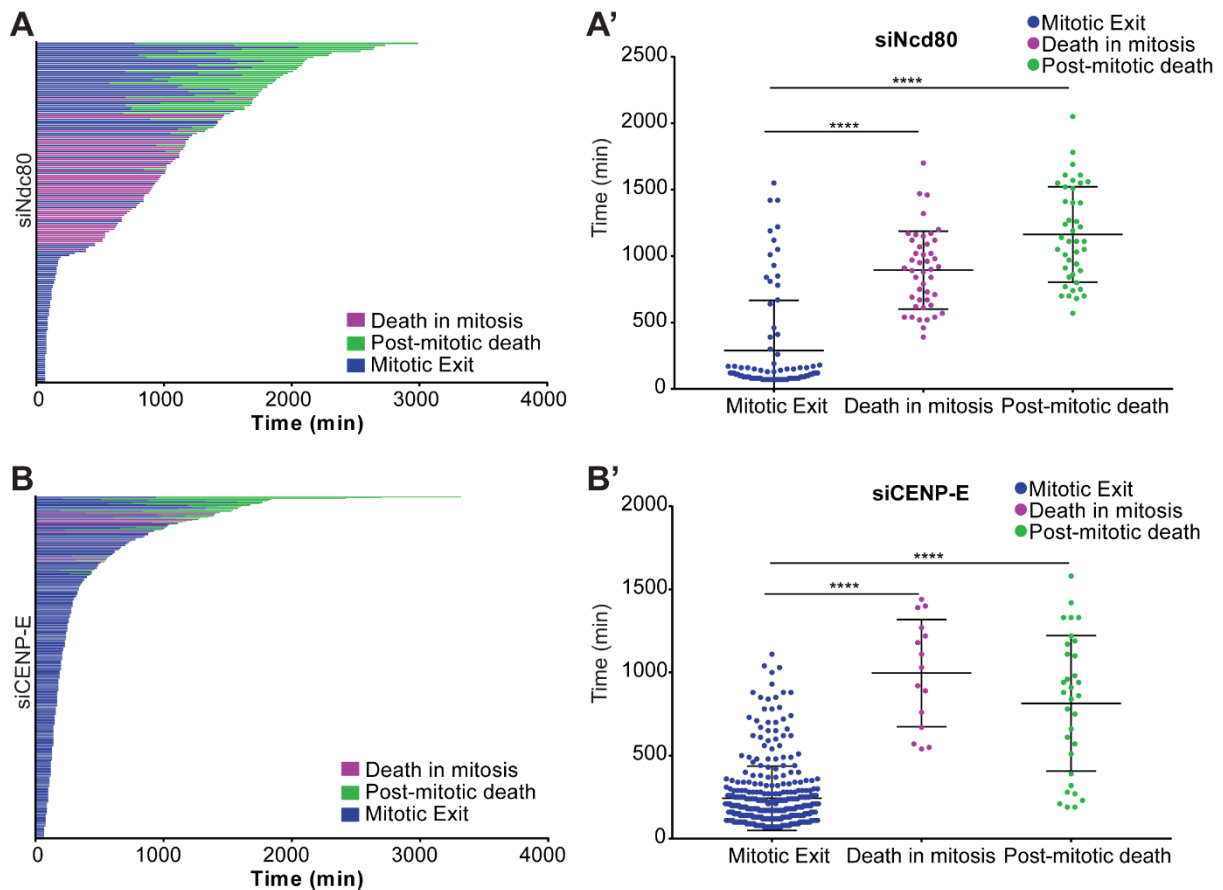

**Figure S4. Cell fate upon induction of chromosome alignment defects of distinct molecular nature, related to Figure 3. a)** Cell fate profiles of HeLa cells with delayed or failed chromosome alignment after Ndc80 depletion. Each line indicates a single cell and respective outcome. **a')** Time that cells spent until mitotic exit (blue), death in mitosis (purple) or in subsequent interphase (green) after Ndc80 depletion. Each dot represents a single cell. The horizontal line indicates the mean of all quantified cells and the error bars represent the standard deviation from a pool of four independent experiments (Mitotic exit,  $289 \pm 377$  min,  $n=83$ ; Death in mitosis,  $894 \pm 292$  min,  $n=45$ ; Post-mitotic death  $1162 \pm 359$  min,  $n=42$ ; \*\*\*\* $p \leq 0.0001$  relative to control, analyzed using a Mann-Whitney Test). **b)** Cell fate profiles of HeLa cells with delayed or failed chromosome alignment after CENP-E depletion. **b')** Time that cells spent until mitotic exit (blue), death in mitosis (purple) or in the subsequent interphase (green) after

CENP-E depletion. Each dot represents a single cell. The horizontal line indicates the mean of all quantified cells and the error bars represent the standard deviation from a pool of five independent experiments (Mitotic exit,  $243 \pm 193$  min,  $n=358$ ; Death in mitosis  $996 \pm 322$  min,  $n=15$ ; Post-mitotic death  $814 \pm 408$  min,  $n=32$ ; \*\*\*\* $p \leq 0.0001$  relative to control, analyzed using a Mann-Whitney Test).



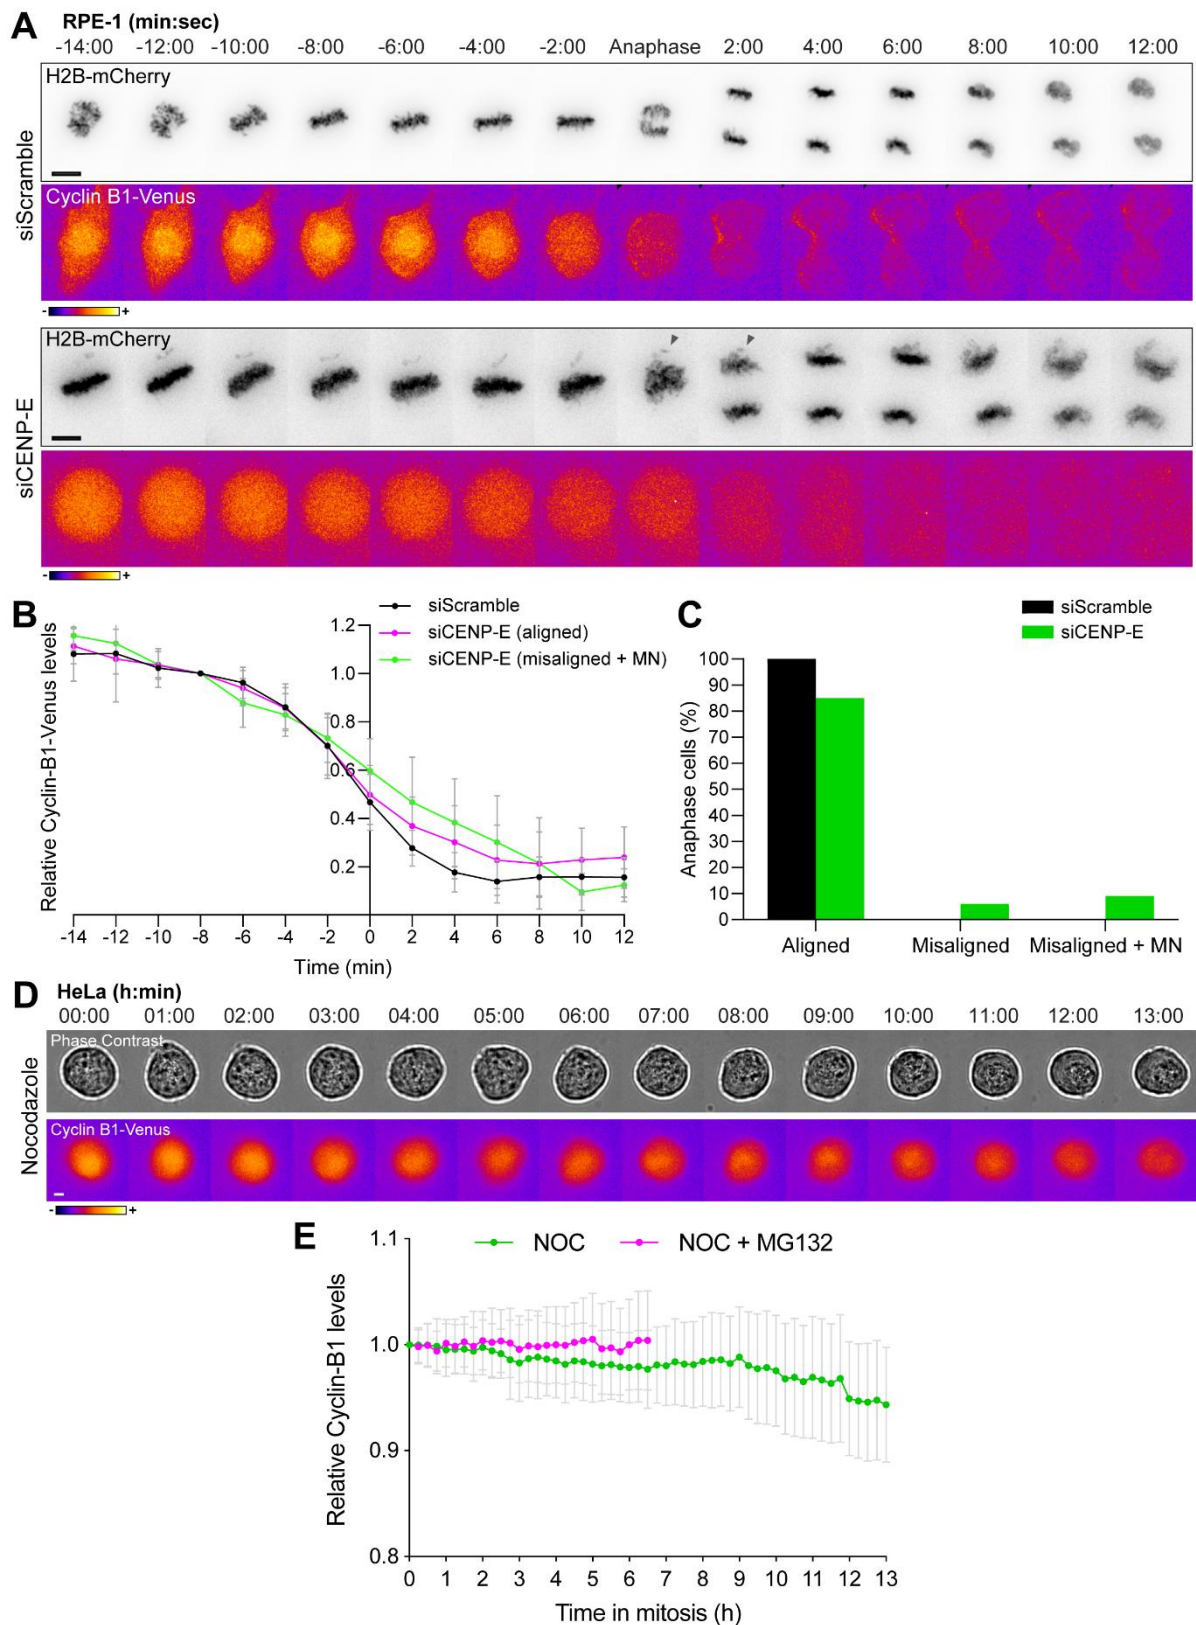

**Figure S5. Further characterization of Cyclin B1 degradation profiles in RPE-1 and HeLa cells, related to Figure 5. a) Selective time frames from live-cell**

microscopy of RPE-1 cells stably expressing H2B-mRFP and Cyclin B1-Venus in control and siCENP-E. Images were acquired every 2 min. Time = min:sec. Time 00:00 = anaphase onset. Black arrowheads point to misaligned chromosomes that remain upon anaphase onset. **b)** Cyclin B1 degradation profile for control, CENP-E- depleted cells that properly align their chromosomes at the metaphase plate and CENP-E- depleted cells that exit mitosis with misaligned chromosomes give rise to micronuclei. Fluorescence intensities were normalized to the levels at time = -8. The curves represent mean Cyclin B1-Venus fluorescence intensity from all analyzed cells and errors bars represent the standard derivation from a pool of three independent experiments (siScramble n=30; siCENP-E (aligned) n=30; siCENP-E (misaligned+micronuclei) n=5). **c)** Frequency of anaphase cells with aligned chromosomes, misaligned chromosomes and misaligned chromosomes that result in micronuclei in control (black bars) and CENP-E-depleted cells (green bars). **d)** Selected time frames from phase-contrast and fluorescence microscopy of Cyclin B1-Venus HeLa cells treated with nocodazole with or without MG132. Images were acquired every 15 min. Scale bar = 5  $\mu$ m. Time = h:min. **e)** Cyclin B1 degradation profiles of nocodazole-treated Cyclin B1-Venus HeLa cells in the presence or absence of MG132. Fluorescence intensities were normalized to the levels at time = 0. The curves depict mean Cyclin B1-Venus fluorescence intensity from all analyzed cells per condition (nocodazole n=12; nocodazole + MG132 n=10), and error bars represent the standard deviation. Note that acquisition in the presence of MG132 was terminated earlier relative to acquisition without MG132 due to cell death.

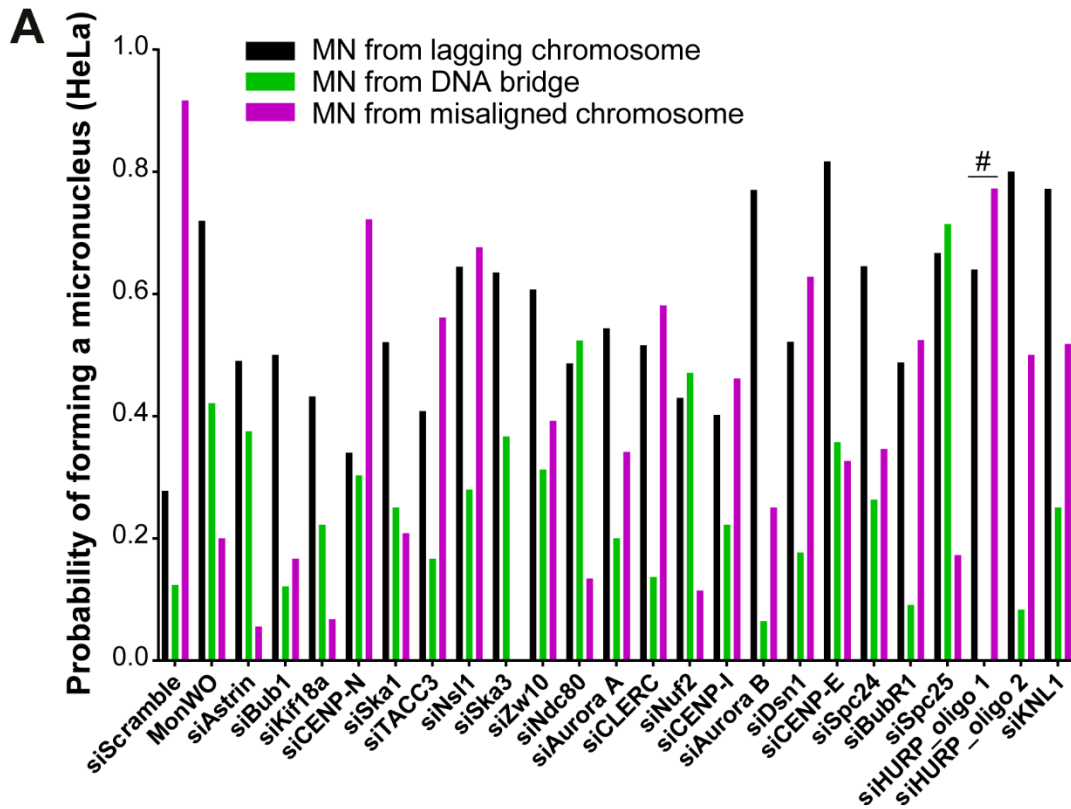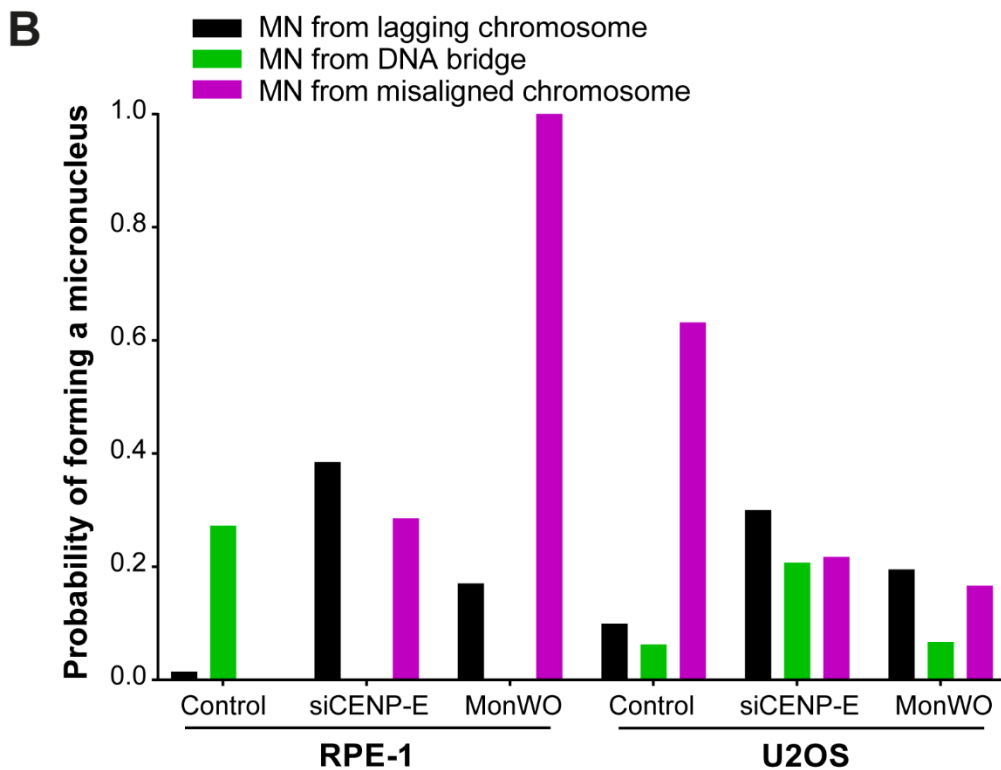

**Figure S6. Absolute probabilities of forming a micronucleus from misaligned chromosomes, DNA bridges and lagging chromosomes in the different cell lines used, related to Figure 6 and Figure 7. a) Absolute probabilities of forming a**

micronucleus of different origins in unperturbed HeLa cells and after molecular perturbations that weaken kinetochore-microtubule attachments or promote the formation of anaphase lagging chromosomes after monastrol treatment and washout (MonWO). [siScramble n=1700, MonWO n=327, siAstrin n=423, siBub1 n=457, siKif18a n= 540, siCENP-N n= 422, siSka1 n=395, siTACC3 n=485, siNsl1 n=400, siSka3 n= 383, siZw10 n= 404, siNdc80 n=440, siAurora A n= 388, siCLERC n=263, siNuf2 n=428, siCENP-I n= 389, siAurora B n=499, siDsn1 n=688, siCENP-E n= 346, siSpc24 n=418, siBubR1 n=387, siSpc25 n= 425, siHURP\_oligo1 n=296, siHURP\_oligo2 n=200, siKNL1 n=413; pool of 2 independent experiments for each siRNAi oligonucleotide per condition, with the exception of Aurora A and CLERC in which only 1 experiment for the second siRNAi oligonucleotide was performed. All independent experiments were pooled]. **b)** Absolute probabilities of forming a micronucleus of different origins in unperturbed RPE-1 and U2OS cells and after CENP-E depletion (siCENP-E) or monastrol treatment and washout. [RPE-1 cells: control, n=163; siCENP-E, n=95; MonWO, n=105]. [U2OS cells: control, n=250; siCENP-E, n=81; MonWO, n=49].

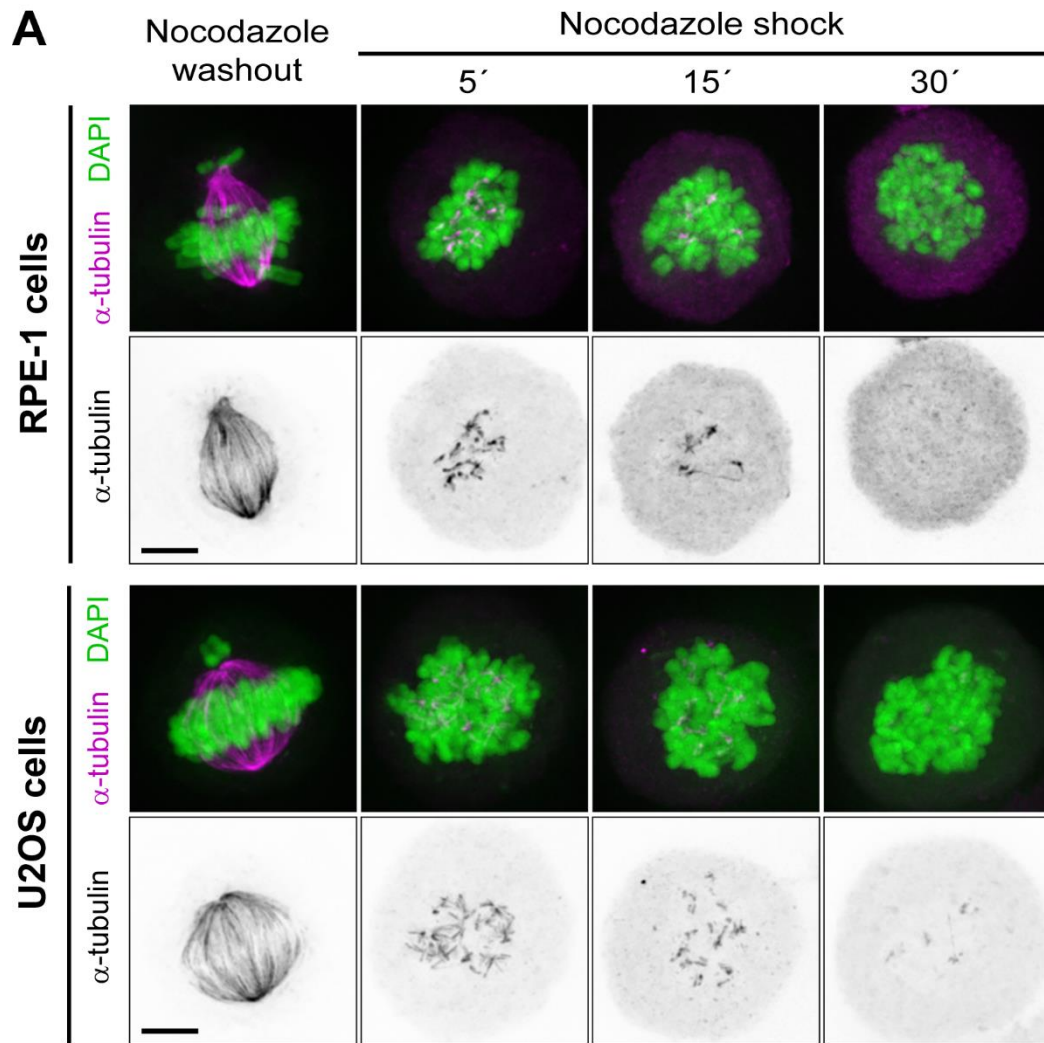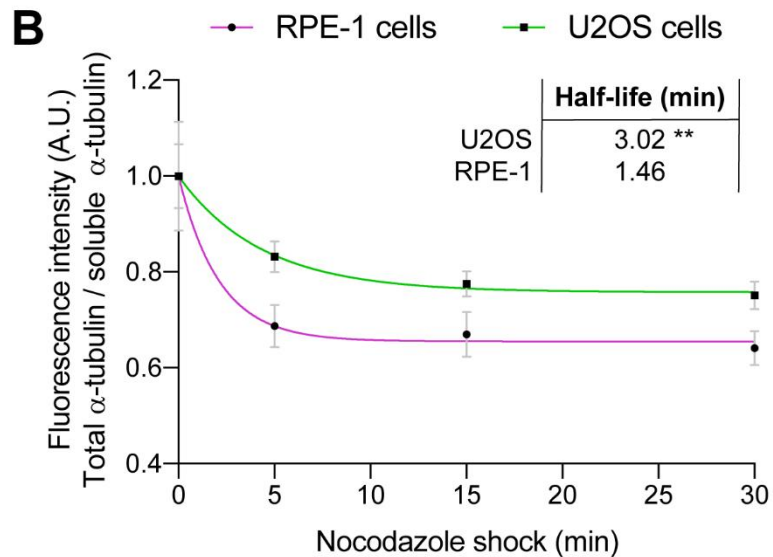

**Figure S7. Misaligned chromosomes in chromosomally unstable cancer cells have hyper-stabilized kinetochore-microtubule attachments, related to Figure 7.**  
 a) Representative immunofluorescence images of RPE-1 and U2OS cells stained for

DNA (green) and  $\alpha$ -tubulin (magenta). RPE-1 and U2OS cells upon nocodazole treatment and washout to generate misaligned chromosomes were processed for immunofluorescence microscopy after a subsequent nocodazole shock 5, 15 and 30 min after drug addition. Representative immunofluorescence images of the mitotic spindle at each stage are shown. Images are maximum intensity projections of deconvolved z-stacks. Scale bar = 5  $\mu$ m. **b)** Normalized  $\alpha$ -tubulin fluorescence intensity at indicated time points in RPE-1 and U2OS cells after nocodazole shock. Fluorescence intensities were normalized to the levels at time = 0. Data represent mean  $\pm$  s.d., U2OS n=22 cells, RPE-1 n=22 cells, from 2 independent experiments. Whole lines show single exponential fitting curve (\*\*p $\leq$ 0.01, extra sum-of-squares F test).

## Supplemental References

- S1. DeLuca, J.G., Moree, B., Hickey, J.M., Kilmartin, J.V., and Salmon, E.D. (2002). hNuf2 inhibition blocks stable kinetochore-microtubule attachment and induces mitotic cell death in HeLa cells. *J Cell Biol* 159, 549-555. 10.1083/jcb.200208159.
- S2. DeLuca, J.G., Dong, Y., Hergert, P., Strauss, J., Hickey, J.M., Salmon, E.D., and McEwen, B.F. (2005). Hec1 and nuf2 are core components of the kinetochore outer plate essential for organizing microtubule attachment sites. *Mol Biol Cell* 16, 519-531. 10.1091/mbc.e04-09-0852.
- S3. Sundin, L.J., Guimaraes, G.J., and Deluca, J.G. (2011). The NDC80 complex proteins Nuf2 and Hec1 make distinct contributions to kinetochore-microtubule attachment in mitosis. *Molecular biology of the cell* 22, 759-768. 10.1091/mbc.E10-08-0671
- mbc.E10-08-0671 [pii].
- S4. Fremont, S., Gerard, A., Galloux, M., Janvier, K., Karess, R.E., and Berlioz-Torrent, C. (2013). Beclin-1 is required for chromosome congression and proper outer kinetochore assembly. *EMBO Rep* 14, 364-372. 10.1038/embor.2013.23.
- S5. Tanenbaum, M.E., Galjart, N., van Vugt, M.A., and Medema, R.H. (2006). CLIP-170 facilitates the formation of kinetochore-microtubule attachments. *EMBO J* 25, 45-57. 10.1038/sj.emboj.7600916.
- S6. Amin, M.A., Kobayashi, K., and Tanaka, K. (2015). CLIP-170 tethers kinetochores to microtubule plus ends against poleward force by dynein for

- stable kinetochore-microtubule attachment. *FEBS Lett* 589, 2739-2746. 10.1016/j.febslet.2015.07.036.
- S7. Ritchie, K., Seah, C., Moulin, J., Isaac, C., Dick, F., and Berube, N.G. (2008). Loss of ATRX leads to chromosome cohesion and congression defects. *J Cell Biol* 180, 315-324. 10.1083/jcb.200706083.
- S8. Archinti, M., Lacasa, C., Teixido-Travesa, N., and Luders, J. (2010). SPICE--a previously uncharacterized protein required for centriole duplication and mitotic chromosome congression. *J Cell Sci* 123, 3039-3046. 10.1242/jcs.069963.
- S9. Deretic, J., Kerr, A., and Welburn, J.P.I. (2019). A rapid computational approach identifies SPICE1 as an Aurora kinase substrate. *Mol Biol Cell* 30, 312-323. 10.1091/mbc.E18-08-0495.
- S10. Santamaria, A., Nagel, S., Sillje, H.H.W., and Nigg, E.A. (2008). The spindle protein CHICA mediates localization of the chromokinesin Kid to the mitotic spindle. *Curr Biol* 18, 723-729. 10.1016/j.cub.2008.04.041.
- S11. Dunsch, A.K., Hammond, D., Lloyd, J., Schermelleh, L., Gruneberg, U., and Barr, F.A. (2012). Dynein light chain 1 and a spindle-associated adaptor promote dynein asymmetry and spindle orientation. *The Journal of cell biology* 198, 1039-1054. 10.1083/jcb.201202112.
- S12. Wang, L., Zhu, G., Yang, D., Li, Q., Li, Y., Xu, X., He, D., and Zeng, C. (2008). The spindle function of CDCA4. *Cell motility and the cytoskeleton* 65, 581-593. 10.1002/cm.20286.
- S13. Jang, C.Y., Wong, J., Coppinger, J.A., Seki, A., Yates, J.R., 3rd, and Fang, G. (2008). DDA3 recruits microtubule depolymerase Kif2a to spindle poles and controls spindle dynamics and mitotic chromosome movement. *J Cell Biol* 181, 255-267. 10.1083/jcb.200711032.



- S14. Ganem, N.J., and Compton, D.A. (2004). The KinI kinesin Kif2a is required for bipolar spindle assembly through a functional relationship with MCAK. *J Cell Biol* 166, 473-478. 10.1083/jcb.200404012.
- S15. Park, S.J. (2010). Huntingtin-interacting protein 1-related is required for accurate congression and segregation of chromosomes. *BMB Rep* 43, 795-800. 10.5483/BMBRep.2010.43.12.795.
- S16. Amin, M.A., Matsunaga, S., Uchiyama, S., and Fukui, K. (2008). Nucleophosmin is required for chromosome congression, proper mitotic spindle formation, and kinetochore-microtubule attachment in HeLa cells. *FEBS Lett* 582, 3839-3844. 10.1016/j.febslet.2008.10.023.
- S17. Holt, S.V., Vergnolle, M.A., Hussein, D., Wozniak, M.J., Allan, V.J., and Taylor, S.S. (2005). Silencing Cenp-F weakens centromeric cohesion, prevents chromosome alignment and activates the spindle checkpoint. *Journal of cell science* 118, 4889-4900. 118/20/4889 [pii] 10.1242/jcs.02614.
- S18. Yang, Z., Guo, J., Chen, Q., Ding, C., Du, J., and Zhu, X. (2005). Silencing mitotin induces misaligned chromosomes, premature chromosome decondensation before anaphase onset, and mitotic cell death. *Mol Cell Biol* 25, 4062-4074. 10.1128/MCB.25.10.4062-4074.2005.
- S19. Nishino, M., Kurasawa, Y., Evans, R., Lin, S.H., Brinkley, B.R., and Yu-Lee, L.Y. (2006). NudC is required for Plk1 targeting to the kinetochore and chromosome congression. *Curr Biol* 16, 1414-1421. 10.1016/j.cub.2006.05.052.

- S20. Chuang, C., Pan, J., Hawke, D.H., Lin, S.H., and Yu-Lee, L.Y. (2013). NudC deacetylation regulates mitotic progression. *PLoS One* 8, e73841. 10.1371/journal.pone.0073841.
- S21. Gambe, A.E., Matsunaga, S., Takata, H., Ono-Maniwa, R., Baba, A., Uchiyama, S., and Fukui, K. (2009). A nucleolar protein RRS1 contributes to chromosome congression. *FEBS Lett* 583, 1951-1956. 10.1016/j.febslet.2009.05.033.
- S22. Zhang, L., Iyer, J., Chowdhury, A., Ji, M., Xiao, L., Yang, S., Chen, Y., Tsai, M.Y., and Dong, J. (2012). KIBRA regulates aurora kinase activity and is required for precise chromosome alignment during mitosis. *J Biol Chem* 287, 34069-34077. 10.1074/jbc.M112.385518.
- S23. Ma, N., Matsunaga, S., Takata, H., Ono-Maniwa, R., Uchiyama, S., and Fukui, K. (2007). Nucleolin functions in nucleolus formation and chromosome congression. *Journal of cell science* 120, 2091-2105. 10.1242/jcs.008771.
- S24. Li, N., Yuan, K., Yan, F., Huo, Y., Zhu, T., Liu, X., Guo, Z., and Yao, X. (2009). PinX1 is recruited to the mitotic chromosome periphery by Nucleolin and facilitates chromosome congression. *Biochem Biophys Res Commun* 384, 76-81. 10.1016/j.bbrc.2009.04.077.
- S25. Jang, C.Y., Coppinger, J.A., Yates, J.R., 3rd, and Fang, G. (2010). Phosphoregulation of DDA3 function in mitosis. *Biochem Biophys Res Commun* 393, 259-263. 10.1016/j.bbrc.2010.01.115.
- S26. Jang, C.Y., Coppinger, J.A., Yates, J.R., 3rd, and Fang, G. (2011). Mitotic kinases regulate MT-polymerizing/MT-bundling activity of DDA3. *Biochem Biophys Res Commun* 408, 174-179. 10.1016/j.bbrc.2011.04.004.

- S27. Jang, C.Y., and Fang, G. (2011). DDA3 associates with MCAK and controls chromosome congression. *Biochem Biophys Res Commun* 407, 610-614. 10.1016/j.bbrc.2011.03.081.
- S28. Park, J.E., Song, H., Kwon, H.J., and Jang, C.Y. (2016). Ska1 cooperates with DDA3 for spindle dynamics and spindle attachment to kinetochore. *Biochem Biophys Res Commun* 470, 586-592. 10.1016/j.bbrc.2016.01.101.
- S29. Johnson, V.L., Scott, M.I., Holt, S.V., Hussein, D., and Taylor, S.S. (2004). Bub1 is required for kinetochore localization of BubR1, Cenp-E, Cenp-F and Mad2, and chromosome congression. *Journal of cell science* 117, 1577-1589. 10.1242/jcs.01006
- 117/8/1577 [pii].
- S30. Morrow, C.J., Tighe, A., Johnson, V.L., Scott, M.I., Ditchfield, C., and Taylor, S.S. (2005). Bub1 and aurora B cooperate to maintain BubR1-mediated inhibition of APC/CCdc20. *J Cell Sci* 118, 3639-3652. 10.1242/jcs.02487.
- S31. Meraldi, P., and Sorger, P.K. (2005). A dual role for Bub1 in the spindle checkpoint and chromosome congression. *The EMBO journal* 24, 1621-1633. 7600641 [pii]
- 10.1038/sj.emboj.7600641.
- S32. Ditchfield, C., Johnson, V.L., Tighe, A., Ellston, R., Haworth, C., Johnson, T., Mortlock, A., Keen, N., and Taylor, S.S. (2003). Aurora B couples chromosome alignment with anaphase by targeting BubR1, Mad2, and Cenp-E to kinetochores. *J Cell Biol* 161, 267-280. 10.1083/jcb.200208091.
- S33. Lampson, M.A., and Kapoor, T.M. (2005). The human mitotic checkpoint protein BubR1 regulates chromosome-spindle attachments. *Nat Cell Biol* 7, 93-98. 10.1038/ncb1208.

- S34. Raaijmakers, J.A., Tanenbaum, M.E., Maia, A.F., and Medema, R.H. (2009). RAMA1 is a novel kinetochore protein involved in kinetochore-microtubule attachment. *J Cell Sci* 122, 2436-2445. 10.1242/jcs.051912.
- S35. Gaitanos, T.N., Santamaria, A., Jeyaprakash, A.A., Wang, B., Conti, E., and Nigg, E.A. (2009). Stable kinetochore-microtubule interactions depend on the Ska complex and its new component Ska3/C13Orf3. *EMBO J* 28, 1442-1452. 10.1038/emboj.2009.96.
- S36. Daum, J.R., Wren, J.D., Daniel, J.J., Sivakumar, S., McAvoy, J.N., Potapova, T.A., and Gorbsky, G.J. (2009). Ska3 is required for spindle checkpoint silencing and the maintenance of chromosome cohesion in mitosis. *Curr Biol* 19, 1467-1472. 10.1016/j.cub.2009.07.017.
- S37. Sivakumar, S., Daum, J.R., Tipton, A.R., Rankin, S., and Gorbsky, G.J. (2014). The spindle and kinetochore-associated (Ska) complex enhances binding of the anaphase-promoting complex/cyclosome (APC/C) to chromosomes and promotes mitotic exit. *Molecular biology of the cell* 25, 594-605. 10.1091/mbc.E13-07-0421.
- S38. Welburn, J.P., Grishchuk, E.L., Backer, C.B., Wilson-Kubalek, E.M., Yates, J.R., 3rd, and Cheeseman, I.M. (2009). The human kinetochore Ska1 complex facilitates microtubule depolymerization-coupled motility. *Dev Cell* 16, 374-385. 10.1016/j.devcel.2009.01.011.
- S39. Garrett, S., Auer, K., Compton, D.A., and Kapoor, T.M. (2002). hTPX2 is required for normal spindle morphology and centrosome integrity during vertebrate cell division. *Curr Biol* 12, 2055-2059. 10.1016/s0960-9822(02)01277-0.

- S40. Goshima, G. (2011). Identification of a TPX2-like microtubule-associated protein in *Drosophila*. *PLoS One* 6, e28120. 10.1371/journal.pone.0028120.
- S41. Itoh, G., Sugino, S., Ikeda, M., Mizuguchi, M., Kanno, S., Amin, M.A., Iemura, K., Yasui, A., Hirota, T., and Tanaka, K. (2013). Nucleoporin Nup188 is required for chromosome alignment in mitosis. *Cancer Sci* 104, 871-879. 10.1111/cas.12159.
- S42. Mazumdar, M., Sundareshan, S., and Misteli, T. (2004). Human chromokinesin KIF4A functions in chromosome condensation and segregation. *J Cell Biol* 166, 613-620. 10.1083/jcb.200401142.
- S43. Yang, Z., Tulu, U.S., Wadsworth, P., and Rieder, C.L. (2007). Kinetochores dynein is required for chromosome motion and congression independent of the spindle checkpoint. *Curr Biol* 17, 973-980. 10.1016/j.cub.2007.04.056.
- S44. Li, Y., Yu, W., Liang, Y., and Zhu, X. (2007). Kinetochores dynein generates a poleward pulling force to facilitate congression and full chromosome alignment. *Cell Res* 17, 701-712. 10.1038/cr.2007.65.
- S45. McHedlishvili, N., Wieser, S., Holtackers, R., Mouysset, J., Belwal, M., Amaro, A.C., and Meraldi, P. (2012). Kinetochores accelerate centrosome separation to ensure faithful chromosome segregation. *J Cell Sci* 125, 906-918. 10.1242/jcs.091967.
- S46. Raemaekers, T., Ribbeck, K., Beaudouin, J., Annaert, W., Van Camp, M., Stockmans, I., Smets, N., Bouillon, R., Ellenberg, J., and Carmeliet, G. (2003). NuSAP, a novel microtubule-associated protein involved in mitotic spindle organization. *J Cell Biol* 162, 1017-1029. 10.1083/jcb.200302129.

- S47. Li, C., Xue, C., Yang, Q., Low, B.C., and Liou, Y.C. (2016). NuSAP governs chromosome oscillation by facilitating the Kid-generated polar ejection force. *Nat Commun* 7, 10597. 10.1038/ncomms10597.
- S48. Ma, N., Matsunaga, S., Morimoto, A., Sakashita, G., Urano, T., Uchiyama, S., and Fukui, K. (2011). The nuclear scaffold protein SAF-A is required for kinetochore-microtubule attachment and contributes to the targeting of Aurora-A to mitotic spindles. *J Cell Sci* 124, 394-404. 10.1242/jcs.063347.
- S49. Yang, S., Liu, X., Yin, Y., Fukuda, M.N., and Zhou, J. (2008). Tustin is required for bipolar spindle assembly and centrosome integrity during mitosis. *FASEB J* 22, 1960-1972. 10.1096/fj.07-081463.
- S50. Dynek, J.N., and Smith, S. (2004). Resolution of sister telomere association is required for progression through mitosis. *Science* 304, 97-100. 10.1126/science.1094754.
- S51. Chang, P., Coughlin, M., and Mitchison, T.J. (2005). Tankyrase-1 polymerization of poly(ADP-ribose) is required for spindle structure and function. *Nat Cell Biol* 7, 1133-1139. 10.1038/ncb1322.
- S52. Hanisch, A., Sillje, H.H., and Nigg, E.A. (2006). Timely anaphase onset requires a novel spindle and kinetochore complex comprising Ska1 and Ska2. *EMBO J* 25, 5504-5515. 10.1038/sj.emboj.7601426.
- S53. Auckland, P., Clarke, N.I., Royle, S.J., and McAinsh, A.D. (2017). Congressing kinetochores progressively load Ska complexes to prevent force-dependent detachment. *J Cell Biol* 216, 1623-1639. 10.1083/jcb.201607096.
- S54. Sillje, H.H., Nagel, S., Korner, R., and Nigg, E.A. (2006). HURP is a Ran-importin beta-regulated protein that stabilizes kinetochore microtubules in the vicinity of chromosomes. *Curr Biol* 16, 731-742. 10.1016/j.cub.2006.02.070.

- S55. Wong, J., and Fang, G. (2006). HURP controls spindle dynamics to promote proper interkinetochore tension and efficient kinetochore capture. *The Journal of cell biology* 173, 879-891. 10.1083/jcb.200511132.
- S56. Ye, F., Tan, L., Yang, Q., Xia, Y., Deng, L.W., Murata-Hori, M., and Liou, Y.C. (2011). HURP regulates chromosome congression by modulating kinesin Kif18A function. *Curr Biol* 21, 1584-1591. 10.1016/j.cub.2011.08.024.
- S57. Zhang, Y., Tan, L., Yang, Q., Li, C., and Liou, Y.C. (2018). The microtubule-associated protein HURP recruits the centrosomal protein TACC3 to regulate K-fiber formation and support chromosome congression. *J Biol Chem* 293, 15733-15747. 10.1074/jbc.RA118.003676.
- S58. Nakamura, A., Arai, H., and Fujita, N. (2009). Centrosomal Aki1 and cohesin function in separase-regulated centriole disengagement. *J Cell Biol* 187, 607-614. 10.1083/jcb.200906019.
- S59. Krauss, S.W., Spence, J.R., Bahmanyar, S., Barth, A.I., Go, M.M., Czerwinski, D., and Meyer, A.J. (2008). Downregulation of protein 4.1R, a mature centriole protein, disrupts centrosomes, alters cell cycle progression, and perturbs mitotic spindles and anaphase. *Mol Cell Biol* 28, 2283-2294. 10.1128/MCB.02021-07.
- S60. Wu, G., Lin, Y.T., Wei, R., Chen, Y., Shan, Z., and Lee, W.H. (2008). Hice1, a novel microtubule-associated protein required for maintenance of spindle integrity and chromosomal stability in human cells. *Mol Cell Biol* 28, 3652-3662. 10.1128/MCB.01923-07.
- S61. Lawo, S., Bashkurov, M., Mullin, M., Ferreria, M.G., Kittler, R., Habermann, B., Tagliaferro, A., Poser, I., Hutchins, J.R., Hegemann, B., et al. (2009). HAUS,

the 8-subunit human Augmin complex, regulates centrosome and spindle integrity. *Curr Biol* 19, 816-826. 10.1016/j.cub.2009.04.033.

- S62. Huang, Y., Yao, Y., Xu, H.Z., Wang, Z.G., Lu, L., and Dai, W. (2009). Defects in chromosome congression and mitotic progression in KIF18A-deficient cells are partly mediated through impaired functions of CENP-E. *Cell Cycle* 8, 2643-2649. 10.4161/cc.8.16.9366.
- S63. Stumpff, J., von Dassow, G., Wagenbach, M., Asbury, C., and Wordeman, L. (2008). The kinesin-8 motor Kif18A suppresses kinetochore movements to control mitotic chromosome alignment. *Dev Cell* 14, 252-262. 10.1016/j.devcel.2007.11.014.
- S64. Liu, X.S., Zhao, X.D., Wang, X., Yao, Y.X., Zhang, L.L., Shu, R.Z., Ren, W.H., Huang, Y., Huang, L., Gu, M.M., et al. (2010). Germinal Cell Aplasia in Kif18a Mutant Male Mice Due to Impaired Chromosome Congression and Dysregulated BubR1 and CENP-E. *Genes & cancer* 1, 26-39. 10.1177/1947601909358184.
- S65. Stumpff, J., Wagenbach, M., Franck, A., Asbury, C.L., and Wordeman, L. (2012). Kif18A and chromokinesins confine centromere movements via microtubule growth suppression and spatial control of kinetochore tension. *Dev Cell* 22, 1017-1029. 10.1016/j.devcel.2012.02.013.
- S66. Mayr, M.I., Hummer, S., Bormann, J., Gruner, T., Adio, S., Woehlke, G., and Mayer, T.U. (2007). The human kinesin Kif18A is a motile microtubule depolymerase essential for chromosome congression. *Curr Biol* 17, 488-498. 10.1016/j.cub.2007.02.036.
- S67. Fonseca, C.L., Malaby, H.L.H., Sepaniac, L.A., Martin, W., Byers, C., Czechanski, A., Messinger, D., Tang, M., Ohi, R., Reinholdt, L.G., and Stumpff,



- J. (2019). Mitotic chromosome alignment ensures mitotic fidelity by promoting interchromosomal compaction during anaphase. *The Journal of cell biology* 218, 1148-1163. 10.1083/jcb.201807228.
- S68. Kimura, M., Yoshioka, T., Saio, M., Banno, Y., Nagaoka, H., and Okano, Y. (2013). Mitotic catastrophe and cell death induced by depletion of centrosomal proteins. *Cell Death Dis* 4, e603. 10.1038/cddis.2013.108.
- S69. Schneider, L., Essmann, F., Kletke, A., Rio, P., Hanenberg, H., Wetzel, W., Schulze-Osthoff, K., Numberg, B., and Piekorz, R.P. (2007). The transforming acidic coiled coil 3 protein is essential for spindle-dependent chromosome alignment and mitotic survival. *J Biol Chem* 282, 29273-29283. 10.1074/jbc.M704151200.
- S70. Lin, C.H., Hu, C.K., and Shih, H.M. (2010). Clathrin heavy chain mediates TACC3 targeting to mitotic spindles to ensure spindle stability. *The Journal of cell biology* 189, 1097-1105. 10.1083/jcb.200911120.
- S71. Cheeseman, L.P., Harry, E.F., McAinsh, A.D., Prior, I.A., and Royle, S.J. (2013). Specific removal of TACC3-ch-TOG-clathrin at metaphase deregulates kinetochore fiber tension. *J Cell Sci* 126, 2102-2113. 10.1242/jcs.124834.
- S72. Gergely, F., Draviam, V.M., and Raff, J.W. (2003). The ch-TOG/XMAP215 protein is essential for spindle pole organization in human somatic cells. *Genes Dev* 17, 336-341. 10.1101/gad.245603.
- S73. Muto, Y., Yoshioka, T., Kimura, M., Matsunami, M., Saya, H., and Okano, Y. (2008). An evolutionarily conserved leucine-rich repeat protein CLERC is a centrosomal protein required for spindle pole integrity. *Cell Cycle* 7, 2738-2748. 10.4161/cc.7.17.6591.

- S74. Oshimori, N., Ohsugi, M., and Yamamoto, T. (2006). The Plk1 target Kizuna stabilizes mitotic centrosomes to ensure spindle bipolarity. *Nat Cell Biol* 8, 1095-1101. 10.1038/ncb1474.
- S75. Fielding, A.B., Dobрева, I., McDonald, P.C., Foster, L.J., and Dedhar, S. (2008). Integrin-linked kinase localizes to the centrosome and regulates mitotic spindle organization. *J Cell Biol* 180, 681-689. 10.1083/jcb.200710074.
- S76. Dunsch, A.K., Linnane, E., Barr, F.A., and Gruneberg, U. (2011). The astrin-kinastrin/SKAP complex localizes to microtubule plus ends and facilitates chromosome alignment. *The Journal of cell biology* 192, 959-968. 10.1083/jcb.201008023.
- S77. Schmidt, J.C., Kiyomitsu, T., Hori, T., Backer, C.B., Fukagawa, T., and Cheeseman, I.M. (2010). Aurora B kinase controls the targeting of the Astrin-SKAP complex to bioriented kinetochores. *J Cell Biol* 191, 269-280. 10.1083/jcb.201006129.
- S78. Fang, L., Seki, A., and Fang, G. (2009). SKAP associates with kinetochores and promotes the metaphase-to-anaphase transition. *Cell Cycle* 8, 2819-2827. 10.4161/cc.8.17.9514.
- S79. Huang, Y., Wang, W., Yao, P., Wang, X., Liu, X., Zhuang, X., Yan, F., Zhou, J., Du, J., Ward, T., et al. (2012). CENP-E kinesin interacts with SKAP protein to orchestrate accurate chromosome segregation in mitosis. *J Biol Chem* 287, 1500-1509. 10.1074/jbc.M111.277194.
- S80. Logarinho, E., Maffini, S., Barisic, M., Marques, A., Toso, A., Meraldi, P., and Maiato, H. (2012). CLASPs prevent irreversible multipolarity by ensuring spindle-pole resistance to traction forces during chromosome alignment. *Nat Cell Biol* 14, 295-303. 10.1038/ncb2423.

- S81. Haren, L., Gnadt, N., Wright, M., and Merdes, A. (2009). NuMA is required for proper spindle assembly and chromosome alignment in prometaphase. *BMC Res Notes* 2, 64. 10.1186/1756-0500-2-64.
- S82. Iwakiri, Y., Kamakura, S., Hayase, J., and Sumimoto, H. (2013). Interaction of NuMA protein with the kinesin Eg5: its possible role in bipolar spindle assembly and chromosome alignment. *Biochem J* 451, 195-204. 10.1042/BJ20121447.
- S83. Wong, R.W., Blobel, G., and Coutavas, E. (2006). Rae1 interaction with NuMA is required for bipolar spindle formation. *Proc Natl Acad Sci U S A* 103, 19783-19787. 10.1073/pnas.0609582104.
- S84. Blower, M.D., Nachury, M., Heald, R., and Weis, K. (2005). A Rae1-containing ribonucleoprotein complex is required for mitotic spindle assembly. *Cell* 121, 223-234. 10.1016/j.cell.2005.02.016.
- S85. Joseph, J., Liu, S.T., Jablonski, S.A., Yen, T.J., and Dasso, M. (2004). The RanGAP1-RanBP2 complex is essential for microtubule-kinetochore interactions in vivo. *Curr Biol* 14, 611-617. 10.1016/j.cub.2004.03.031.
- S86. Barisic, M., Sohm, B., Mikolcevic, P., Wandke, C., Rauch, V., Ringer, T., Hess, M., Bonn, G., and Geley, S. (2010). Spindly/CCDC99 is required for efficient chromosome congression and mitotic checkpoint regulation. *Molecular biology of the cell* 21, 1968-1981. 10.1091/mbc.E09-04-0356

E09-04-0356 [pii].

- S87. Raaijmakers, J.A., Tanenbaum, M.E., and Medema, R.H. (2013). Systematic dissection of dynein regulators in mitosis. *The Journal of cell biology* 201, 201-215. 10.1083/jcb.201208098.
- S88. Torres, J.Z., Summers, M.K., Peterson, D., Brauer, M.J., Lee, J., Senese, S., Gholkar, A.A., Lo, Y.C., Lei, X., Jung, K., et al. (2011). The STARD9/Kif16a

- kinesin associates with mitotic microtubules and regulates spindle pole assembly. *Cell* 147, 1309-1323. 10.1016/j.cell.2011.11.020.
- S89. Holmfeldt, P., Zhang, X., Stenmark, S., Walczak, C.E., and Gullberg, M. (2005). CaMKII $\gamma$ -mediated inactivation of the Kin I kinesin MCAK is essential for bipolar spindle formation. *EMBO J* 24, 1256-1266. 10.1038/sj.emboj.7600601.
- S90. Maia, A.F., Feijao, T., Vromans, M.J., Sunkel, C.E., and Lens, S.M. (2010). Aurora B kinase cooperates with CENP-E to promote timely anaphase onset. *Chromosoma* 119, 405-413. 10.1007/s00412-010-0265-x.
- S91. Stevens, D., Gassmann, R., Oegema, K., and Desai, A. (2011). Uncoordinated loss of chromatid cohesion is a common outcome of extended metaphase arrest. *PLoS One* 6, e22969. 10.1371/journal.pone.0022969.
- S92. Tanudji, M., Shoemaker, J., L'Italien, L., Russell, L., Chin, G., and Schebye, X.M. (2004). Gene silencing of CENP-E by small interfering RNA in HeLa cells leads to missegregation of chromosomes after a mitotic delay. *Molecular biology of the cell* 15, 3771-3781. 10.1091/mbc.e03-07-0482.
- S93. Barisic, M., Aguiar, P., Geley, S., and Maiato, H. (2014). Kinetochore motors drive congression of peripheral polar chromosomes by overcoming random arm-ejection forces. *Nat Cell Biol* 16, 1249-1256. 10.1038/ncb3060.
- S94. Royle, S.J., Bright, N.A., and Lagnado, L. (2005). Clathrin is required for the function of the mitotic spindle. *Nature* 434, 1152-1157. 10.1038/nature03502.
- S95. Foraker, A.B., Camus, S.M., Evans, T.M., Majeed, S.R., Chen, C.Y., Taner, S.B., Correa, I.R., Jr., Doxsey, S.J., and Brodsky, F.M. (2012). Clathrin promotes centrosome integrity in early mitosis through stabilization of centrosomal ch-TOG. *The Journal of cell biology* 198, 591-605. 10.1083/jcb.201205116.

- S96. Oshimori, N., Li, X., Ohsugi, M., and Yamamoto, T. (2009). Cep72 regulates the localization of key centrosomal proteins and proper bipolar spindle formation. *The EMBO journal* 28, 2066-2076. 10.1038/emboj.2009.161.
- S97. Kim, K., and Rhee, K. (2011). The pericentriolar satellite protein CEP90 is crucial for integrity of the mitotic spindle pole. *Journal of cell science* 124, 338-347. 10.1242/jcs.078329.
- S98. Mimori-Kiyosue, Y., Grigoriev, I., Lansbergen, G., Sasaki, H., Matsui, C., Severin, F., Galjart, N., Grosveld, F., Vorobjev, I., Tsukita, S., and Akhmanova, A. (2005). CLASP1 and CLASP2 bind to EB1 and regulate microtubule plus-end dynamics at the cell cortex. *J Cell Biol* 168, 141-153. 10.1083/jcb.200405094.
- S99. Girao, H., Okada, N., Rodrigues, T.A., Silva, A.O., Figueiredo, A.C., Garcia, Z., Moutinho-Santos, T., Hayashi, I., Azevedo, J.E., Macedo-Ribeiro, S., and Maiato, H. (2020). CLASP2 binding to curved microtubule tips promotes flux and stabilizes kinetochore attachments. *J Cell Biol* 219. 10.1083/jcb.201905080.
- S100. Maiato, H., Rieder, C.L., Earnshaw, W.C., and Sunkel, C.E. (2003). How do kinetochores CLASP dynamic microtubules? *Cell Cycle* 2, 511-514. 10.4161/cc.2.6.576.
- S101. Fuller, B.G., Lampson, M.A., Foley, E.A., Rosasco-Nitcher, S., Le, K.V., Tobelmann, P., Brautigan, D.L., Stukenberg, P.T., and Kapoor, T.M. (2008). Midzone activation of aurora B in anaphase produces an intracellular phosphorylation gradient. *Nature* 453, 1132-1136. 10.1038/nature06923.
- S102. Hauf, S., Cole, R.W., LaTerra, S., Zimmer, C., Schnapp, G., Walter, R., Heckel, A., van Meel, J., Rieder, C.L., and Peters, J.M. (2003). The small molecule

- Hesperadin reveals a role for Aurora B in correcting kinetochore-microtubule attachment and in maintaining the spindle assembly checkpoint. *J Cell Biol* 161, 281-294. 10.1083/jcb.200208092.
- S103. Hegarat, N., Smith, E., Nayak, G., Takeda, S., Evers, P.A., and Hochegger, H. (2011). Aurora A and Aurora B jointly coordinate chromosome segregation and anaphase microtubule dynamics. *J Cell Biol* 195, 1103-1113. 10.1083/jcb.201105058.
- S104. Thein, K.H., Kleylein-Sohn, J., Nigg, E.A., and Gruneberg, U. (2007). Astrin is required for the maintenance of sister chromatid cohesion and centrosome integrity. *J Cell Biol* 178, 345-354. 10.1083/jcb.200701163.
- S105. Hoar, K., Chakravarty, A., Rabino, C., Wysong, D., Bowman, D., Roy, N., and Ecsedy, J.A. (2007). MLN8054, a small-molecule inhibitor of Aurora A, causes spindle pole and chromosome congression defects leading to aneuploidy. *Mol Cell Biol* 27, 4513-4525. 10.1128/MCB.02364-06.
- S106. Sasai, K., Parant, J.M., Brandt, M.E., Carter, J., Adams, H.P., Stass, S.A., Killary, A.M., Katayama, H., and Sen, S. (2008). Targeted disruption of Aurora A causes abnormal mitotic spindle assembly, chromosome misalignment and embryonic lethality. *Oncogene* 27, 4122-4127. 10.1038/onc.2008.47.
- S107. De Luca, M., Lavia, P., and Guarguaglini, G. (2006). A functional interplay between Aurora-A, Plk1 and TPX2 at spindle poles: Plk1 controls centrosomal localization of Aurora-A and TPX2 spindle association. *Cell Cycle* 5, 296-303. 10.4161/cc.5.3.2392.
- S108. De Luca, M., Brunetto, L., Asteriti, I.A., Giubettini, M., Lavia, P., and Guarguaglini, G. (2008). Aurora-A and ch-TOG act in a common pathway in

control of spindle pole integrity. *Oncogene* 27, 6539-6549.  
10.1038/onc.2008.252.

- S109. Mackay, A.M., Ainsztein, A.M., Eckley, D.M., and Earnshaw, W.C. (1998). A dominant mutant of inner centromere protein (INCENP), a chromosomal protein, disrupts prometaphase congression and cytokinesis. *J Cell Biol* 140, 991-1002. 10.1083/jcb.140.5.991.
- S110. Xu, Z., Ogawa, H., Vagnarelli, P., Bergmann, J.H., Hudson, D.F., Ruchaud, S., Fukagawa, T., Earnshaw, W.C., and Samejima, K. (2009). INCENP-aurora B interactions modulate kinase activity and chromosome passenger complex localization. *The Journal of cell biology* 187, 637-653. 10.1083/jcb.200906053.
- S111. Dai, J., Sultan, S., Taylor, S.S., and Higgins, J.M. (2005). The kinase haspin is required for mitotic histone H3 Thr 3 phosphorylation and normal metaphase chromosome alignment. *Genes & development* 19, 472-488. 10.1101/gad.1267105.
- S112. Dai, J., Kateneva, A.V., and Higgins, J.M. (2009). Studies of haspin-depleted cells reveal that spindle-pole integrity in mitosis requires chromosome cohesion. *J Cell Sci* 122, 4168-4176. 10.1242/jcs.054122.
- S113. Xu, P., Virshup, D.M., and Lee, S.H. (2014). B56-PP2A regulates motor dynamics for mitotic chromosome alignment. *J Cell Sci* 127, 4567-4573. 10.1242/jcs.154609.
- S114. Bharadwaj, R., Qi, W., and Yu, H. (2004). Identification of two novel components of the human NDC80 kinetochore complex. *J Biol Chem* 279, 13076-13085. 10.1074/jbc.M310224200.
- S115. McClelland, M.L., Kallio, M.J., Barrett-Wilt, G.A., Kestner, C.A., Shabanowitz, J., Hunt, D.F., Gorbsky, G.J., and Stukenberg, P.T. (2004). The vertebrate

- Ndc80 complex contains Spc24 and Spc25 homologs, which are required to establish and maintain kinetochore-microtubule attachment. *Curr Biol* 14, 131-137. 10.1016/j.cub.2003.12.058.
- S116. Lo, K.W., Kogoy, J.M., and Pfister, K.K. (2007). The DYNLT3 light chain directly links cytoplasmic dynein to a spindle checkpoint protein, Bub3. *J Biol Chem* 282, 11205-11212. 10.1074/jbc.M611279200.
- S117. Vergnolle, M.A., and Taylor, S.S. (2007). Cenp-F links kinetochores to Ndel1/Nde1/Lis1/dynein microtubule motor complexes. *Curr Biol* 17, 1173-1179. 10.1016/j.cub.2007.05.077.
- S118. Moon, H.M., Youn, Y.H., Pemble, H., Yingling, J., Wittmann, T., and Wynshaw-Boris, A. (2014). LIS1 controls mitosis and mitotic spindle organization via the LIS1-NDEL1-dynein complex. *Hum Mol Genet* 23, 449-466. 10.1093/hmg/ddt436.
- S119. Auckland, P., and McAinsh, A.D. (2015). Building an integrated model of chromosome congression. *J Cell Sci* 128, 3363-3374. 10.1242/jcs.169367.
- S120. Horgan, C.P., Hanscom, S.R., and McCaffrey, M.W. (2011). Dynein LIC1 localizes to the mitotic spindle and midbody and LIC2 localizes to spindle poles during cell division. *Cell Biol Int* 35, 171-178. 10.1042/CBI20100284.
- S121. Einarson, M.B., Cukierman, E., Compton, D.A., and Golemis, E.A. (2004). Human enhancer of invasion-cluster, a coiled-coil protein required for passage through mitosis. *Mol Cell Biol* 24, 3957-3971. 10.1128/MCB.24.9.3957-3971.2004.
- S122. Lens, S.M., Wolthuis, R.M., Klompaker, R., Kauw, J., Agami, R., Brummelkamp, T., Kops, G., and Medema, R.H. (2003). Survivin is required for



- a sustained spindle checkpoint arrest in response to lack of tension. *EMBO J* 22, 2934-2947. 10.1093/emboj/cdg307.
- S123. Carvalho, A., Carmena, M., Sambade, C., Earnshaw, W.C., and Wheatley, S.P. (2003). Survivin is required for stable checkpoint activation in taxol-treated HeLa cells. *J Cell Sci* 116, 2987-2998. 10.1242/jcs.00612.
- S124. Uren, A.G., Wong, L., Pakusch, M., Fowler, K.J., Burrows, F.J., Vaux, D.L., and Choo, K.H. (2000). Survivin and the inner centromere protein INCENP show similar cell-cycle localization and gene knockout phenotype. *Curr Biol* 10, 1319-1328. 10.1016/s0960-9822(00)00769-7.
- S125. Cho, J.H., Chang, C.J., Chen, C.Y., and Tang, T.K. (2006). Depletion of CPAP by RNAi disrupts centrosome integrity and induces multipolar spindles. *Biochem Biophys Res Commun* 339, 742-747. 10.1016/j.bbrc.2005.11.074.
- S126. Martin-Lluesma, S., Stucke, V.M., and Nigg, E.A. (2002). Role of Hec1 in spindle checkpoint signaling and kinetochore recruitment of Mad1/Mad2. *Science* 297, 2267-2270. 10.1126/science.1075596.
- S127. Li, L., Yang, L., Scudiero, D.A., Miller, S.A., Yu, Z.X., Stukenberg, P.T., Shoemaker, R.H., and Kotin, R.M. (2007). Development of recombinant adeno-associated virus vectors carrying small interfering RNA (shHec1)-mediated depletion of kinetochore Hec1 protein in tumor cells. *Gene Ther* 14, 814-827. 10.1038/sj.gt.3302933.
- S128. Lee, M.H., Lin, L., Equilibrina, I., Uchiyama, S., Matsunaga, S., and Fukui, K. (2011). ASURA (PHB2) Is Required for Kinetochore Assembly and Subsequent Chromosome Congression. *Acta Histochem Cytochem* 44, 247-258. 10.1267/ahc.11033.

- S129. Gassmann, R., Carvalho, A., Henzing, A.J., Ruchaud, S., Hudson, D.F., Honda, R., Nigg, E.A., Gerloff, D.L., and Earnshaw, W.C. (2004). Borealin: a novel chromosomal passenger required for stability of the bipolar mitotic spindle. *J Cell Biol* 166, 179-191. 10.1083/jcb.200404001.
- S130. Beauchene, N.A., Diaz-Martinez, L.A., Furniss, K., Hsu, W.S., Tsai, H.J., Chamberlain, C., Esponda, P., Gimenez-Abian, J.F., and Clarke, D.J. (2010). Rad21 is required for centrosome integrity in human cells independently of its role in chromosome cohesion. *Cell Cycle* 9, 1774-1780. 10.4161/cc.9.9.11524.
- S131. Diaz-Martinez, L.A., Beauchene, N.A., Furniss, K., Esponda, P., Gimenez-Abian, J.F., and Clarke, D.J. (2010). Cohesin is needed for bipolar mitosis in human cells. *Cell Cycle* 9, 1764-1773. 10.4161/cc.9.9.11525.
- S132. Woolner, S., O'Brien, L.L., Wiese, C., and Bement, W.M. (2008). Myosin-10 and actin filaments are essential for mitotic spindle function. *J Cell Biol* 182, 77-88. 10.1083/jcb.200804062.
- S133. Wang, X., Yang, Y., Duan, Q., Jiang, N., Huang, Y., Darzynkiewicz, Z., and Dai, W. (2008). sSgo1, a major splice variant of Sgo1, functions in centriole cohesion where it is regulated by Plk1. *Dev Cell* 14, 331-341. 10.1016/j.devcel.2007.12.007.
- S134. McGuinness, B.E., Hirota, T., Kudo, N.R., Peters, J.M., and Nasmyth, K. (2005). Shugoshin prevents dissociation of cohesin from centromeres during mitosis in vertebrate cells. *PLoS Biol* 3, e86. 10.1371/journal.pbio.0030086.
- S135. McKinley, K.L., Sekulic, N., Guo, L.Y., Tsinman, T., Black, B.E., and Cheeseman, I.M. (2015). The CENP-L-N Complex Forms a Critical Node in an Integrated Meshwork of Interactions at the Centromere-Kinetochore Interface. *Mol Cell* 60, 886-898. 10.1016/j.molcel.2015.10.027.

- S136. Prendergast, L., van Vuuren, C., Kaczmarczyk, A., Doering, V., Hellwig, D., Quinn, N., Hoischen, C., Diekmann, S., and Sullivan, K.F. (2011). Premitotic assembly of human CENPs -T and -W switches centromeric chromatin to a mitotic state. *PLoS Biol* 9, e1001082. 10.1371/journal.pbio.1001082.
- S137. Wood, L., Booth, D.G., Vargiu, G., Ohta, S., deLima Alves, F., Samejima, K., Fukagawa, T., Rappsilber, J., and Earnshaw, W.C. (2016). Auxin/AID versus conventional knockouts: distinguishing the roles of CENP-T/W in mitotic kinetochore assembly and stability. *Open Biol* 6, 150230. 10.1098/rsob.150230.
- S138. Ali, A., Veeranki, S.N., Chinchole, A., and Tyagi, S. (2017). MLL/WDR5 Complex Regulates Kif2A Localization to Ensure Chromosome Congression and Proper Spindle Assembly during Mitosis. *Dev Cell* 41, 605-622 e607. 10.1016/j.devcel.2017.05.023.
- S139. Chun, Y., Kim, R., and Lee, S. (2016). Centromere Protein (CENP)-W Interacts with Heterogeneous Nuclear Ribonucleoprotein (hnRNP) U and May Contribute to Kinetochore-Microtubule Attachment in Mitotic Cells. *PLoS One* 11, e0149127. 10.1371/journal.pone.0149127.
- S140. Liu, X., Zheng, H., and Qu, C.K. (2012). Protein tyrosine phosphatase Shp2 (Ptpn11) plays an important role in maintenance of chromosome stability. *Cancer Res* 72, 5296-5306. 10.1158/0008-5472.CAN-12-1495.
- S141. Takata, H., Matsunaga, S., Morimoto, A., Ma, N., Kurihara, D., Ono-Maniwa, R., Nakagawa, M., Azuma, T., Uchiyama, S., and Fukui, K. (2007). PHB2 protects sister-chromatid cohesion in mitosis. *Curr Biol* 17, 1356-1361. 10.1016/j.cub.2007.07.009.

- S142. Equilibrina, I., Matsunaga, S., Morimoto, A., Hashimoto, T., Uchiyama, S., and Fukui, K. (2013). ASURA (PHB2) interacts with Scc1 through chromatin. *Cytogenet Genome Res* 139, 225-233. 10.1159/000350004.
- S143. Orthaus, S., Ohndorf, S., and Diekmann, S. (2006). RNAi knockdown of human kinetochore protein CENP-H. *Biochem Biophys Res Commun* 348, 36-46. 10.1016/j.bbrc.2006.06.187.
- S144. Amaro, A.C., Samora, C.P., Holtackers, R., Wang, E., Kingston, I.J., Alonso, M., Lampson, M., McAinsh, A.D., and Meraldi, P. (2010). Molecular control of kinetochore-microtubule dynamics and chromosome oscillations. *Nat Cell Biol* 12, 319-329. 10.1038/ncb2033.
- S145. Carleton, M., Mao, M., Biery, M., Warren, P., Kim, S., Buser, C., Marshall, C.G., Fernandes, C., Annis, J., and Linsley, P.S. (2006). RNA interference-mediated silencing of mitotic kinesin KIF14 disrupts cell cycle progression and induces cytokinesis failure. *Mol Cell Biol* 26, 3853-3863. 10.1128/MCB.26.10.3853-3863.2006.
- S146. Zhu, C., Zhao, J., Bibikova, M., Levenson, J.D., Bossy-Wetzell, E., Fan, J.B., Abraham, R.T., and Jiang, W. (2005). Functional analysis of human microtubule-based motor proteins, the kinesins and dyneins, in mitosis/cytokinesis using RNA interference. *Mol Biol Cell* 16, 3187-3199. 10.1091/mbc.e05-02-0167.
- S147. Draviam, V.M., Stegmeier, F., Nalepa, G., Sowa, M.E., Chen, J., Liang, A., Hannon, G.J., Sorger, P.K., Harper, J.W., and Elledge, S.J. (2007). A functional genomic screen identifies a role for TAO1 kinase in spindle-checkpoint signalling. *Nat Cell Biol* 9, 556-564. 10.1038/ncb1569.

- S148. Shrestha, R.L., Tamura, N., Fries, A., Levin, N., Clark, J., and Draviam, V.M. (2014). TAO1 kinase maintains chromosomal stability by facilitating proper congression of chromosomes. *Open Biol* 4, 130108. 10.1098/rsob.130108.
- S149. Hashizume, C., Nakano, H., Yoshida, K., and Wong, R.W. (2010). Characterization of the role of the tumor marker Nup88 in mitosis. *Mol Cancer* 9, 119. 1476-4598-9-119 [pii]  
10.1186/1476-4598-9-119.
- S150. Uematsu, K., Okumura, F., Tonogai, S., Joo-Okumura, A., Alemayehu, D.H., Nishikimi, A., Fukui, Y., Nakatsukasa, K., and Kamura, T. (2016). ASB7 regulates spindle dynamics and genome integrity by targeting DDA3 for proteasomal degradation. *J Cell Biol* 215, 95-106. 10.1083/jcb.201603062.
- S151. Jaramillo-Lambert, A., Hao, J., Xiao, H., Li, Y., Han, Z., and Zhu, W. (2013). Acidic nucleoplasmic DNA-binding protein (And-1) controls chromosome congression by regulating the assembly of centromere protein A (CENP-A) at centromeres. *J Biol Chem* 288, 1480-1488. 10.1074/jbc.M112.429266.
- S152. Zhu, M., Wang, F., Yan, F., Yao, P.Y., Du, J., Gao, X., Wang, X., Wu, Q., Ward, T., Li, J., et al. (2008). Septin 7 interacts with centromere-associated protein E and is required for its kinetochore localization. *J Biol Chem* 283, 18916-18925. 10.1074/jbc.M710591200.
- S153. Kim, S., and Jang, C.Y. (2016). ANKRD53 interacts with DDA3 and regulates chromosome integrity during mitosis. *Biochem Biophys Res Commun* 470, 484-491. 10.1016/j.bbrc.2016.01.144.
- S154. Milev, M.P., Hasaj, B., Saint-Dic, D., Snounou, S., Zhao, Q., and Sacher, M. (2015). TRAMM/TrappC12 plays a role in chromosome congression,

- kinetochore stability, and CENP-E recruitment. *The Journal of cell biology* 209, 221-234. 10.1083/jcb.201501090.
- S155. Spiliotis, E.T., Kinoshita, M., and Nelson, W.J. (2005). A mitotic septin scaffold required for Mammalian chromosome congression and segregation. *Science* 307, 1781-1785. 10.1126/science.1106823.
- S156. Zuccolo, M., Alves, A., Galy, V., Bolhy, S., Formstecher, E., Racine, V., Sibarita, J.B., Fukagawa, T., Shiekhattar, R., Yen, T., and Doye, V. (2007). The human Nup107-160 nuclear pore subcomplex contributes to proper kinetochore functions. *EMBO J* 26, 1853-1864. 10.1038/sj.emboj.7601642.
- S157. Platani, M., Santarella-Mellwig, R., Posch, M., Walczak, R., Swedlow, J.R., and Mattaj, I.W. (2009). The Nup107-160 nucleoporin complex promotes mitotic events via control of the localization state of the chromosome passenger complex. *Mol Biol Cell* 20, 5260-5275. 10.1091/mbc.E09-05-0377.
- S158. Bancroft, J., Auckland, P., Samora, C.P., and McAinsh, A.D. (2015). Chromosome congression is promoted by CENP-Q- and CENP-E-dependent pathways. *Journal of cell science* 128, 171-184. 10.1242/jcs.163659.
- S159. Koliou, X., Fedonidis, C., Kalpachidou, T., and Mangoura, D. (2016). Nuclear import mechanism of neurofibromin for localization on the spindle and function in chromosome congression. *J Neurochem* 136, 78-91. 10.1111/jnc.13401.
- S160. Zhuo, X., Guo, X., Zhang, X., Jing, G., Wang, Y., Chen, Q., Jiang, Q., Liu, J., and Zhang, C. (2015). Usp16 regulates kinetochore localization of Plk1 to promote proper chromosome alignment in mitosis. *J Cell Biol* 210, 727-735. 10.1083/jcb.201502044.
- S161. Oh, H.J., Kim, M.J., Song, S.J., Kim, T., Lee, D., Kwon, S.H., Choi, E.J., and Lim, D.S. (2010). MST1 limits the kinase activity of aurora B to promote stable

- kinetochore-microtubule attachment. *Curr Biol* 20, 416-422. 10.1016/j.cub.2009.12.054.
- S162. Shimizu, H., Nagamori, I., Yabuta, N., and Nojima, H. (2009). GAK, a regulator of clathrin-mediated membrane traffic, also controls centrosome integrity and chromosome congression. *J Cell Sci* 122, 3145-3152. 10.1242/jcs.052795.
- S163. Basilico, F., Maffini, S., Weir, J.R., Prumbaum, D., Rojas, A.M., Zimniak, T., De Antoni, A., Jeganathan, S., Voss, B., van Gerwen, S., et al. (2014). The pseudo GTPase CENP-M drives human kinetochore assembly. *Elife* 3, e02978. 10.7554/eLife.02978.
- S164. Foltz, D.R., Jansen, L.E., Black, B.E., Bailey, A.O., Yates, J.R., 3rd, and Cleveland, D.W. (2006). The human CENP-A centromeric nucleosome-associated complex. *Nat Cell Biol* 8, 458-469. 10.1038/ncb1397.
- S165. Hua, S., Wang, Z., Jiang, K., Huang, Y., Ward, T., Zhao, L., Dou, Z., and Yao, X. (2011). CENP-U cooperates with Hec1 to orchestrate kinetochore-microtubule attachment. *J Biol Chem* 286, 1627-1638. 10.1074/jbc.M110.174946.
- S166. He, J., Zhang, Z., Ouyang, M., Yang, F., Hao, H., Lamb, K.L., Yang, J., Yin, Y., and Shen, W.H. (2016). PTEN regulates EG5 to control spindle architecture and chromosome congression during mitosis. *Nat Commun* 7, 12355. 10.1038/ncomms12355.
- S167. O'Regan, L., Sampson, J., Richards, M.W., Knebel, A., Roth, D., Hood, F.E., Straube, A., Royle, S.J., Bayliss, R., and Fry, A.M. (2015). Hsp72 is targeted to the mitotic spindle by Nek6 to promote K-fiber assembly and mitotic progression. *J Cell Biol* 209, 349-358. 10.1083/jcb.201409151.

- S168. Serio, G., Margaria, V., Jensen, S., Oldani, A., Bartek, J., Bussolino, F., and Lanzetti, L. (2011). Small GTPase Rab5 participates in chromosome congression and regulates localization of the centromere-associated protein CENP-F to kinetochores. *Proc Natl Acad Sci U S A* 108, 17337-17342. 10.1073/pnas.1103516108.
- S169. Liu, S.T., Hittle, J.C., Jablonski, S.A., Campbell, M.S., Yoda, K., and Yen, T.J. (2003). Human CENP-I specifies localization of CENP-F, MAD1 and MAD2 to kinetochores and is essential for mitosis. *Nat Cell Biol* 5, 341-345. 10.1038/ncb953.
- S170. Nishihashi, A., Haraguchi, T., Hiraoka, Y., Ikemura, T., Regnier, V., Dodson, H., Earnshaw, W.C., and Fukagawa, T. (2002). CENP-I is essential for centromere function in vertebrate cells. *Dev Cell* 2, 463-476. 10.1016/s1534-5807(02)00144-2.
- S171. Kline, S.L., Cheeseman, I.M., Hori, T., Fukagawa, T., and Desai, A. (2006). The human Mis12 complex is required for kinetochore assembly and proper chromosome segregation. *J Cell Biol* 173, 9-17. 10.1083/jcb.200509158.
- S172. Lin, Y.T., Chen, Y., Wu, G., and Lee, W.H. (2006). Hec1 sequentially recruits Zwint-1 and ZW10 to kinetochores for faithful chromosome segregation and spindle checkpoint control. *Oncogene* 25, 6901-6914. 10.1038/sj.onc.1209687.
- S173. Wang, H., Hu, X., Ding, X., Dou, Z., Yang, Z., Shaw, A.W., Teng, M., Cleveland, D.W., Goldberg, M.L., Niu, L., and Yao, X. (2004). Human Zwint-1 specifies localization of Zeste White 10 to kinetochores and is essential for mitotic checkpoint signaling. *J Biol Chem* 279, 54590-54598. 10.1074/jbc.M407588200.



- S174. Ghongane, P., Kapanidou, M., Asghar, A., Elowe, S., and Bolanos-Garcia, V.M. (2014). The dynamic protein Knl1 - a kinetochore rendezvous. *J Cell Sci* 127, 3415-3423. 10.1242/jcs.149922.
- S175. Caldas, G.V., and DeLuca, J.G. (2014). KNL1: bringing order to the kinetochore. *Chromosoma* 123, 169-181. 10.1007/s00412-013-0446-5.
- S176. Mackay, D.R., Elgort, S.W., and Ullman, K.S. (2009). The nucleoporin Nup153 has separable roles in both early mitotic progression and the resolution of mitosis. *Mol Biol Cell* 20, 1652-1660. 10.1091/mbc.E08-08-0883.
- S177. Lussi, Y.C., Shumaker, D.K., Shimi, T., and Fahrenkrog, B. (2010). The nucleoporin Nup153 affects spindle checkpoint activity due to an association with Mad1. *Nucleus* 1, 71-84. 10.4161/nucl.1.1.10244.
- S178. Chatel, G., and Fahrenkrog, B. (2011). Nucleoporins: leaving the nuclear pore complex for a successful mitosis. *Cell Signal* 23, 1555-1562. 10.1016/j.cellsig.2011.05.023.
- S179. Honda, S., Marumoto, T., Hirota, T., Nitta, M., Arima, Y., Ogawa, M., and Saya, H. (2004). Activation of m-calpain is required for chromosome alignment on the metaphase plate during mitosis. *J Biol Chem* 279, 10615-10623. 10.1074/jbc.M308841200.
- S180. Asteriti, I.A., Giubettini, M., Lavia, P., and Guarguaglini, G. (2011). Aurora-A inactivation causes mitotic spindle pole fragmentation by unbalancing microtubule-generated forces. *Mol Cancer* 10, 131. 10.1186/1476-4598-10-131.
- S181. Karamysheva, Z., Diaz-Martinez, L.A., Crow, S.E., Li, B., and Yu, H. (2009). Multiple anaphase-promoting complex/cyclosome degrons mediate the

- degradation of human Sgo1. *J Biol Chem* 284, 1772-1780. 10.1074/jbc.M807083200.
- S182. Labade, A.S., Karmodiya, K., and Sengupta, K. (2016). HOXA repression is mediated by nucleoporin Nup93 assisted by its interactors Nup188 and Nup205. *Epigenetics Chromatin* 9, 54. 10.1186/s13072-016-0106-0.
- S183. Kops, G.J., Kim, Y., Weaver, B.A., Mao, Y., McLeod, I., Yates, J.R., 3rd, Tagaya, M., and Cleveland, D.W. (2005). ZW10 links mitotic checkpoint signaling to the structural kinetochore. *J Cell Biol* 169, 49-60. 10.1083/jcb.200411118.
- S184. Chan, Y.W., Fava, L.L., Uldschmid, A., Schmitz, M.H., Gerlich, D.W., Nigg, E.A., and Santamaria, A. (2009). Mitotic control of kinetochore-associated dynein and spindle orientation by human Spindly. *J Cell Biol* 185, 859-874. 10.1083/jcb.200812167.
- S185. Thomas, G.E., Bandopadhyay, K., Sutradhar, S., Renjith, M.R., Singh, P., Gireesh, K.K., Simon, S., Badarudeen, B., Gupta, H., Banerjee, M., et al. (2016). EB1 regulates attachment of Ska1 with microtubules by forming extended structures on the microtubule lattice. *Nat Commun* 7, 11665. 10.1038/ncomms11665.
- S186. Fielding, A.B., Lim, S., Montgomery, K., Dobrev, I., and Dedhar, S. (2011). A critical role of integrin-linked kinase, ch-TOG and TACC3 in centrosome clustering in cancer cells. *Oncogene* 30, 521-534. 10.1038/onc.2010.431.
- S187. Srivastava, S., and Panda, D. (2018). A centrosomal protein STARD9 promotes microtubule stability and regulates spindle microtubule dynamics. *Cell Cycle* 17, 2052-2068. 10.1080/15384101.2018.1513764.

- S188. Vassilopoulos, S., Esk, C., Hoshino, S., Funke, B.H., Chen, C.Y., Plocik, A.M., Wright, W.E., Kucherlapati, R., and Brodsky, F.M. (2009). A role for the CHC22 clathrin heavy-chain isoform in human glucose metabolism. *Science* 324, 1192-1196. 10.1126/science.1171529.
- S189. Cheng, T.S., Hsiao, Y.L., Lin, C.C., Hsu, C.M., Chang, M.S., Lee, C.I., Yu, R.C., Huang, C.Y., Howng, S.L., and Hong, Y.R. (2007). hNinein is required for targeting spindle-associated protein Astrin to the centrosome during the S and G2 phases. *Exp Cell Res* 313, 1710-1721. 10.1016/j.yexcr.2007.02.023.
- S190. Kuang, P., Chen, Z., Wang, J., Liu, Z., Wang, J., Gao, J., and Shen, L. (2017). Characterization of Aurora A and Its Impact on the Effect of Cisplatin-Based Chemotherapy in Patients with Non-Small Cell Lung Cancer. *Transl Oncol* 10, 367-377. 10.1016/j.tranon.2017.02.010.
- S191. Kesisova, I.A., Nakos, K.C., Tsolou, A., Angelis, D., Lewis, J., Chatzaki, A., Agianian, B., Giannis, A., and Koffa, M.D. (2013). Tripolin A, a novel small-molecule inhibitor of aurora A kinase, reveals new regulation of HURP's distribution on microtubules. *PLoS One* 8, e58485. 10.1371/journal.pone.0058485.
- S192. Liu, D., Ding, X., Du, J., Cai, X., Huang, Y., Ward, T., Shaw, A., Yang, Y., Hu, R., Jin, C., and Yao, X. (2007). Human NUF2 interacts with centromere-associated protein E and is essential for a stable spindle microtubule-kinetochore attachment. *J Biol Chem* 282, 21415-21424. 10.1074/jbc.M609026200.
- S193. Chun, Y., Lee, M., Park, B., and Lee, S. (2013). CSN5/JAB1 interacts with the centromeric components CENP-T and CENP-W and regulates their

- proteasome-mediated degradation. *J Biol Chem* 288, 27208-27219. 10.1074/jbc.M113.469221.
- S194. Kim, S., and Yu, H. (2015). Multiple assembly mechanisms anchor the KMN spindle checkpoint platform at human mitotic kinetochores. *J Cell Biol* 208, 181-196. 10.1083/jcb.201407074.
- S195. Tsang, Y.H., Han, X., Man, W.Y., Lee, N., and Poon, R.Y. (2012). Novel functions of the phosphatase SHP2 in the DNA replication and damage checkpoints. *PLoS One* 7, e49943. 10.1371/journal.pone.0049943.
- S196. Xu, H., Choe, C., Shin, S.H., Park, S.W., Kim, H.S., Jung, S.H., Yim, S.H., Kim, T.M., and Chung, Y.J. (2014). Silencing of KIF14 interferes with cell cycle progression and cytokinesis by blocking the p27(Kip1) ubiquitination pathway in hepatocellular carcinoma. *Exp Mol Med* 46, e97. 10.1038/emm.2014.23.
- S197. Bernad, R., van der Velde, H., Fornerod, M., and Pickersgill, H. (2004). Nup358/RanBP2 attaches to the nuclear pore complex via association with Nup88 and Nup214/CAN and plays a supporting role in CRM1-mediated nuclear protein export. *Mol Cell Biol* 24, 2373-2384. 10.1128/MCB.24.6.2373-2384.2004.
- S198. Zhu, W., Ukomadu, C., Jha, S., Senga, T., Dhar, S.K., Wohlschlegel, J.A., Nutt, L.K., Kornbluth, S., and Dutta, A. (2007). Mcm10 and And-1/CTF4 recruit DNA polymerase alpha to chromatin for initiation of DNA replication. *Genes Dev* 21, 2288-2299. 10.1101/gad.1585607.
- S199. Yoshizawa-Sugata, N., and Masai, H. (2009). Roles of human AND-1 in chromosome transactions in S phase. *J Biol Chem* 284, 20718-20728. 10.1074/jbc.M806711200.

- S200. Kremer, B.E., Haystead, T., and Macara, I.G. (2005). Mammalian septins regulate microtubule stability through interaction with the microtubule-binding protein MAP4. *Mol Biol Cell* 16, 4648-4659. 10.1091/mbc.e05-03-0267.
- S201. Park, H.J., Lee, S.J., Sohn, Y.B., Jin, H.S., Han, J.H., Kim, Y.B., Yim, H., and Jeong, S.Y. (2013). NF1 deficiency causes Bcl-xL upregulation in Schwann cells derived from neurofibromatosis type 1-associated malignant peripheral nerve sheath tumors. *Int J Oncol* 42, 657-666. 10.3892/ijo.2012.1751.
- S202. Qian, Y., Wang, B., Ma, A., Zhang, L., Xu, G., Ding, Q., Jing, T., Wu, L., Liu, Y., Yang, Z., and Liu, Y. (2016). USP16 Downregulation by Carboxyl-terminal Truncated HBx Promotes the Growth of Hepatocellular Carcinoma Cells. *Sci Rep* 6, 33039. 10.1038/srep33039.
- S203. Lee, D.W., Zhao, X., Zhang, F., Eisenberg, E., and Greene, L.E. (2005). Depletion of GAK/auxilin 2 inhibits receptor-mediated endocytosis and recruitment of both clathrin and clathrin adaptors. *J Cell Sci* 118, 4311-4321. 10.1242/jcs.02548.
- S204. Wu, H., Zhou, Y., Wu, H., Xu, L., Yan, Y., Tong, X., and Yan, H. (2021). CENPN Acts as a Novel Biomarker that Correlates With the Malignant Phenotypes of Glioma Cells. *Front Genet* 12, 732376. 10.3389/fgene.2021.732376.
- S205. Chan, Y.W., Jeyapakash, A.A., Nigg, E.A., and Santamaria, A. (2012). Aurora B controls kinetochore-microtubule attachments by inhibiting Ska complex-KMN network interaction. *J Cell Biol* 196, 563-571. 10.1083/jcb.201109001.
- S206. Zhang, G., Lischetti, T., Hayward, D.G., and Nilsson, J. (2015). Distinct domains in Bub1 localize RZZ and BubR1 to kinetochores to regulate the checkpoint. *Nat Commun* 6, 7162. 10.1038/ncomms8162.

- S207. Goshima, G., Kiyomitsu, T., Yoda, K., and Yanagida, M. (2003). Human centromere chromatin protein hMis12, essential for equal segregation, is independent of CENP-A loading pathway. *The Journal of cell biology* 160, 25-39. [10.1083/jcb.200210005](https://doi.org/10.1083/jcb.200210005).
- S208. Schleicher, K., Porter, M., Ten Have, S., Sundaramoorthy, R., Porter, I.M., and Swedlow, J.R. (2017). The Ndc80 complex targets Bod1 to human mitotic kinetochores. *Open Biol* 7. [10.1098/rsob.170099](https://doi.org/10.1098/rsob.170099).
- S209. Hahn, P., Schmidt, C., Weber, M., Kang, J., and Bielke, W. (2004). RNA interference: PCR strategies for the quantification of stable degradation-fragments derived from siRNA-targeted mRNAs. *Biomol Eng* 21, 113-117. [10.1016/j.bioeng.2004.09.001](https://doi.org/10.1016/j.bioeng.2004.09.001).
