# Supplementary material for: Micronuclei from misaligned chromosomes that satisfy the spindle assembly checkpoint in cancer cells
Source: PubMed Central journal article supplement — Curr Biol. 2022 Oct 10;32(19):4240–4254.e5. doi: 10.1016/j.cub.2022.08.026 (PMC9559752; doi:10.1016/j.cub.2022.08.026), 2022-10-10
Supplement: mmc2.pdf [file mmc2.pdf]

**Data S1. Overview of the genes associated with chromosome congression defects analyzed in the present study, related to Figure 1.**

| <b>Protein name</b> | <b>Subcellular localization</b> | <b>Chromosome congression defects described previously</b>                                                                                                                                            | <b>Number of cells analyzed</b>          | <b>Validation of depletion by WB</b> | <b>References</b> |
|---------------------|---------------------------------|-------------------------------------------------------------------------------------------------------------------------------------------------------------------------------------------------------|------------------------------------------|--------------------------------------|-------------------|
| Nuf2_oligo1         | Kinetochores                    | Prometaphase arrest; mitotic death                                                                                                                                                                    | 310 cells from 2 independent experiments | yes                                  | S1-S3             |
| Nuf2_oligo2         |                                 |                                                                                                                                                                                                       | 224 cells from 2 independent experiments | yes                                  |                   |
| Beclin-1            | kinetochores                    | Misaligned chromosomes; prometaphase arrest; mitotic death;                                                                                                                                           | 374 cells from 2 independent experiments | no                                   | S4                |
| CLIP-170            | Kinetochores; mitotic spindle   | Misaligned chromosomes; prometaphase arrest                                                                                                                                                           | 311 cells from 2 independent experiments | no                                   | S5,S6             |
| ATRX_oligo1         | Pericentromeric heterochromatin | Misaligned chromosomes; prometaphase arrest; abnormal nuclear morphology (lobulated nuclei and intranuclear DNA bridges); chromosome segregation defects (lagging chromosomes and chromosome bridges) | 392 cells from 2 independent experiments | yes                                  | S7                |
| ATRX_oligo2         | Pericentromeric heterochromatin | Misaligned chromosomes; prometaphase arrest; abnormal nuclear morphology (lobulated nuclei and intranuclear DNA bridges); chromosome segregation defects (lagging chromosomes and chromosome bridges) | 400 cells from 2 independent experiments | yes                                  | S7                |
| SPICE               | Mitotic spindle; centrioles     | Misaligned chromosomes; multipolar spindles                                                                                                                                                           | 504 cells from 2 independent experiments | no                                   | S8,S9             |
| CHICA               | Mitotic spindle                 | Misaligned chromosomes, mitotic delay                                                                                                                                                                 | 380 cells from 2 independent experiments | no                                   | S10,S11           |
| CDCA4               |                                 | Multipolar spindle                                                                                                                                                                                    | 154 cells from 2 independent experiments | no                                   | S12               |
| Kif2a_oligo1        | Spindle poles                   | Partial knockdown of Kif2a accumulated cells with misaligned chromosomes;                                                                                                                             | 600 cells from 3 independent experiments | yes                                  | S13,S14           |

|                                                |                                                      |                                                                                                                                                                         |                                                   |     |             |
|------------------------------------------------|------------------------------------------------------|-------------------------------------------------------------------------------------------------------------------------------------------------------------------------|---------------------------------------------------|-----|-------------|
|                                                |                                                      | prometaphase delay;<br>monopolar spindles                                                                                                                               |                                                   |     |             |
| Kif2a_oligo2                                   | Spindle poles                                        |                                                                                                                                                                         | 600 cells<br>from 3<br>independent<br>experiments | yes | S14         |
| HIP1r                                          | Mitotic spindle                                      | Misaligned<br>chromosomes; mitotic<br>delay                                                                                                                             | 200 cells<br>from 2<br>independent<br>experiments | no  | S15         |
| Nucleophosmin<br>(NPM1)                        | Chromosome<br>periphery                              | Abnormal nuclear<br>shape, tetraploid<br>micronuclei formation;<br>lost proliferation ability;<br>Misaligned<br>chromosomes;<br>disorganized spindles;<br>mitotic delay | 329 cells<br>from 3<br>independent<br>experiments | no  | S16         |
| CENP-F/mitosin                                 | kinetochore                                          | Misaligned<br>chromosomes; mitotic<br>delay; aberrant spindle<br>morphology, cell death                                                                                 | 398 cells<br>from 2<br>independent<br>experiments | no  | S17,S18     |
| NudC                                           | kinetochore                                          | Misaligned<br>chromosomes;<br>prometaphase delay;<br>Chromosome<br>segregation defects<br>(lagging chromosomes)                                                         | 338 cells<br>from 2<br>independent<br>experiments | no  | S19,S20     |
| RRS1 (Regulator<br>of Ribosome<br>Synthesis 1) | Chromosome<br>periphery                              | Misaligned<br>chromosomes;<br>prometaphase delay                                                                                                                        | 397 cells<br>from 2<br>independent<br>experiments | no  | S21         |
| KIBRA                                          | ND                                                   | Misaligned<br>chromosomes; aberrant<br>spindle morphology;<br>Chromosome<br>segregation defects<br>(lagging chromosomes)                                                | 401 cells<br>from 2<br>independent<br>experiments | no  | S22         |
| Nucleolin                                      | Nucleoli;<br>chromosome<br>periphery                 | Misaligned<br>chromosomes;<br>prometaphase delay;<br>aberrant spindle<br>morphology                                                                                     | 150 cells<br>from 2<br>independent<br>experiments | no  | 23,24       |
| DDA3_oligo1                                    | Spindle<br>microtubules;<br>kinetochores;<br>midbody | Misaligned<br>chromosomes;<br>prometaphase delay                                                                                                                        | 399 cells<br>from 2<br>independent<br>experiments | no  | S13,S25-S28 |
| DDA3_oligo2                                    | Spindle<br>microtubules;<br>kinetochores;<br>midbody |                                                                                                                                                                         | 383 cells<br>from 2<br>independent<br>experiments | no  | S13,S25-S28 |
| Bub1_oligo1                                    | Kinetochore                                          | Misaligned<br>chromosomes;<br>prometaphase delay;<br>Chromosome<br>segregation defects<br>(lagging chromosomes)                                                         | 400 cells<br>from 2<br>independent<br>experiments | yes | S29-S31     |
| Bub1_oligo2                                    |                                                      |                                                                                                                                                                         | 257 cells<br>from 2<br>independent<br>experiments | yes |             |
| BubR1_oligo1                                   | Kinetochore                                          | Misaligned<br>chromosomes;<br>Chromosome<br>segregation defects<br>(lagging chromosomes)                                                                                | 620 cells<br>from 3<br>independent<br>experiments | yes | S32,S33     |

|               |                                       |                                                                                                                                             |                                          |     |             |
|---------------|---------------------------------------|---------------------------------------------------------------------------------------------------------------------------------------------|------------------------------------------|-----|-------------|
| BubR1_oligo2  |                                       |                                                                                                                                             | 236 cells from 2 independent experiments | yes |             |
| Ska3_oligo1   | Kinetochores; mitotic spindle         | Misaligned chromosomes, prometaphase delay, metaphase arrest, problems in maintenance of chromosome alignment, cohesion fatigue; cell death | 343 cells from 2 independent experiments | yes | S34 S35-S38 |
| Ska3_oligo2   | Kinetochores; mitotic spindle         |                                                                                                                                             | 400 cells from 2 independent experiments | yes |             |
| TPX2          | Nucleus; spindle pole; spindle        | Multipolar spindles; misaligned chromosomes                                                                                                 | 403 cells from 3 independent experiments | no  | S39,S40     |
| Nup188_oligo1 | centrosomes                           | Misaligned chromosomes, prometaphase delay                                                                                                  | 500 cells from 3 independent experiments | no  | S41         |
| Nup188_oligo2 | centrosomes                           |                                                                                                                                             | 272 cells from 2 independent experiments | no  |             |
| Kif4a_oligo1  | Chromosome arms; spindle midzone      | Misaligned chromosomes; mitotic delay; spindle defects; chromosome mis-segregation (lagging chromosomes and chromosome bridges)             | 252 cells from 2 independent experiments | yes | S42         |
| Kif4a_oligo2  | Chromosome arms; spindle midzone      |                                                                                                                                             | 348 cells from 2 independent experiments | yes |             |
| Zw10_oligo1   | kinetochores                          | Misaligned chromosomes; prometaphase delay                                                                                                  | 899 cells from 5 independent experiments | yes | S43,S44     |
| Zw10_oligo2   |                                       |                                                                                                                                             | 217 cells from 2 independent experiments | yes |             |
| CENP-L        | kinetochores                          | Chromosome alignment defects; chromosome mis-segregation (lagging chromosomes)                                                              | 405 cells from 3 independent experiments | no  | S45         |
| NUSAP1        | Central spindle                       | Aberrant mitotic spindle, chromosome alignment defects; defective chromosome segregation; cytokinesis failure                               | 208 cells from 2 independent experiments | no  | S46,S47     |
| SAF-A/hnRNP-U | Spindle microtubules; spindle midzone | Aberrant mitotic spindles; Misaligned chromosomes; exit with misaligned chromosomes; prometaphase delay; cytokinesis failure                | 375 cells from 2 independent experiments | no  | S48         |

|               |                                                        |                                                                                                                                             |                                          |     |                     |
|---------------|--------------------------------------------------------|---------------------------------------------------------------------------------------------------------------------------------------------|------------------------------------------|-----|---------------------|
| Tastin/TROAP  | Mitotic spindles in mitosis; centrosomes in interphase | Mitotic delay; Chromosome alignment defects; aberrant mitotic spindles; multipolar spindles                                                 | 304 cells from 2 independent experiments | no  | S49                 |
| Tankyrase-1   | Centrosome                                             | Mitotic delay; metaphase delay                                                                                                              | 566 cells from 3 independent experiments | no  | S50,S51             |
| Ska1_oligo1   | Kinetochores; mitotic spindle                          | Misaligned chromosomes, prometaphase delay, metaphase arrest, problems in maintenance of chromosome alignment, cohesion fatigue; cell death | 316 cells from 2 independent experiments | yes | S35,S37,S38,S52,S53 |
| Ska1_oligo2   |                                                        |                                                                                                                                             | 249 cells from 2 independent experiments | yes |                     |
| HURP          | kinetochores                                           | Misaligned chromosomes; prometaphase delay                                                                                                  | 296 cells from 2 independent experiments | yes | S54-S57             |
| Aki1/CC2D1A   | centrosome                                             | Multipolar spindles due to spindle pole fragmentation                                                                                       | 202 cells from 2 independent experiments | no  | S58                 |
| 4.1r          | Mature centriole                                       | Misaligned chromosomes; Multipolar spindles; Monopolar spindles                                                                             | 451 cells from 3 independent experiments | yes | S59                 |
| HICE1/HAUS8   | Centrosome; mitotic spindle, spindle midzone; midbody  | Misaligned chromosomes; mitotic delay; aberrant mitotic spindles; multipolar spindles, spindle pole fragmentation                           | 377 cells from 2 independent experiments | no  | S60,S61             |
| Ska2          | Kinetochores; mitotic spindle                          | Misaligned chromosomes, prometaphase delay, metaphase arrest, problems in maintenance of chromosome alignment, cohesion fatigue             | 399 cells from 2 independent experiments | yes | S35,S37,S52         |
| Kif18a_oligo1 | Plus-ends of KMTs                                      | Misaligned chromosomes; prometaphase delay; long mitotic spindle; chromosomes mis-segregation (lagging chromosomes); Micronuclei formation  | 330 cells from 2 independent experiments | yes | S62-S67             |
| Kif18a_oligo2 |                                                        |                                                                                                                                             | 236 cells from 2 independent experiments | yes |                     |
| TACC3_oligo1  | centrosome                                             | Misaligned chromosomes; mitotic delay; disorganized spindles; cell death                                                                    | 360 cells from 3 independent experiments | yes | S68-S72             |
| TACC3_oligo2  |                                                        |                                                                                                                                             | 285 cells from 2                         | yes |                     |

|                          |                                             |                                                                                                       |                                          |     |         |
|--------------------------|---------------------------------------------|-------------------------------------------------------------------------------------------------------|------------------------------------------|-----|---------|
|                          |                                             |                                                                                                       | independent experiments                  |     |         |
| CLERC_Oligo1             | Centrosomes                                 | Misaligned chromosomes; multipolar spindles                                                           | 294 cells from 2 independent experiments | yes | S73     |
| CLERC_Oligo2             | Centrosomes                                 |                                                                                                       | 400 cells from 2 independent experiments | yes |         |
| Kizuna                   | Mature centriole; pericentriolar satellites | Misaligned chromosomes; multipolar spindles; spindle pole fragmentation                               | 358 cells from 2 independent experiments | no  | S74     |
| ILK                      | Plasma membrane; focal adhesion; cytosol    | Aberrant mitotic spindles, Misaligned chromosomes                                                     | 300 cells from 3 independent experiments | no  | S75     |
| Kinastrin/SKAP           | Spindle pole; Kinetochores                  | Prometaphase delay; metaphase delay; multipolar spindles; spindle pole fragmentation                  | 355 cells from 2 independent experiments | no  | S76-S79 |
| Ninein                   | Mature centriole; pericentriolar satellites | Misaligned chromosomes; multipolar spindles                                                           | 200 cells from 2 independent experiments | no  | S80     |
| NuMA                     | Nucleus; spindle pole                       | Aberrant mitotic spindles, Misaligned chromosomes                                                     | 188 cells from 2 independent experiments | yes | S81,S82 |
| Rae1_oligo1              | Nuclear pore; spindle pole                  | Misaligned chromosomes; multipolar spindles; lagging chromosomes;                                     | 358 cells from 2 independent experiments | no  | S83,S84 |
| Rae1_oligo2              |                                             |                                                                                                       | 311 cells from 2 independent experiments | no  |         |
| RanBP2_oligo1            | Nuclear pore; kinetochores; spindle pole    | Misaligned chromosomes; multipolar spindles                                                           | 400 cells from 2 independent experiments | no  | S85     |
| RanBP2_oligo2            |                                             |                                                                                                       | 231 cells from 1 experiment              | no  |         |
| Spindly                  | Kinetochores; spindle pole                  | Misaligned chromosomes; prometaphase delay                                                            | 600 cells from 3 independent experiments | no  | S86,S87 |
| STARD9                   | Daughter centriole                          | Misaligned chromosomes; mitotic delay; multipolar spindles; spindle pole fragmentation; mitotic death | 198 cells from 2 independent experiments | no  | S88     |
| CAMKII $\gamma$ (CAMK2G) | Cytosol                                     | Misaligned chromosomes; multipolar spindles                                                           | 371 cells from 2 independent experiments | no  | S89     |
| CENP-E_oligo1            | Kinetochores                                | Misaligned chromosomes; prometaphase delay; exit with misaligned                                      | 259 cells from 3 independent experiments | yes | S90-S93 |

|                 |                                                                 |                                                                                                                                                                      |                                          |     |              |
|-----------------|-----------------------------------------------------------------|----------------------------------------------------------------------------------------------------------------------------------------------------------------------|------------------------------------------|-----|--------------|
|                 |                                                                 | chromosomes; die in or after mitosis                                                                                                                                 |                                          |     |              |
| CENP-E_oligo2   |                                                                 |                                                                                                                                                                      | 187 cells from 2 independent experiments | yes |              |
| CHC17 clathrin  | Mitotic spindle; centrosome                                     | Chromosome misalignment; mitotic delay; disorganized spindles; multipolar spindles; spindle pole fragmentation                                                       | 299 cells from 2 independent experiments | no  | S70,S94,S95  |
| CEP72_oligo1    | centrosome                                                      | Misaligned chromosomes; multipolar spindles; spindle pole fragmentation                                                                                              | 379 cells from 2 independent experiments | yes | S96          |
| CEP72_oligo2    | centrosome                                                      |                                                                                                                                                                      | 170 cells from 2 independent experiments | yes |              |
| CEP90_oligo1    | Centrosome; pericentriolar satellites                           | Misaligned chromosomes; aberrant mitotic spindles; multipolar spindles                                                                                               | 471 cells from 3 independent experiments | yes | S97          |
| CEP90_oligo2    | Centrosome; pericentriolar satellites                           |                                                                                                                                                                      | 155 cells from 2 independent experiments | yes |              |
| CLASP2b         | Centrosome; kinetochore; microtubule plus ends; central spindle | Misaligned chromosomes; prometaphase delay; chromosome mis-segregation (lagging chromosomes and chromosome bridges); multipolar spindles; spindle pole fragmentation | 408 cells from 2 independent experiments | yes | S80,S98,S99  |
| CLASP1b         | Centrosome; kinetochore; microtubule plus ends; central spindle | Misaligned chromosomes; chromosome mis-segregation (lagging chromosomes and chromosome bridges); multipolar spindles; spindle pole fragmentation                     | 402 cells from 2 independent experiments | yes | S80,S98,S100 |
| CLASP1+2        |                                                                 |                                                                                                                                                                      | 300 cells from 2 independent experiments | yes |              |
| Aurora B_oligo1 | Centromere; spindle, spindle midzone                            | Misaligned chromosomes; chromosome mis-segregation; cytokinesis defects                                                                                              | 287 cells from 2 independent experiments | yes | S101-S103    |
| Aurora B_oligo2 |                                                                 |                                                                                                                                                                      | 212 cells from 2 independent experiments | yes |              |
| Astrin_oligo1   | Spindle pole; kinetochores                                      | Misaligned chromosomes; prometaphase delay; multipolar spindles;                                                                                                     | 400 cells from 2 independent experiments | yes | S76,S77,S104 |

|                      |                               |                                                                                                                                                                 |                                          |     |                |
|----------------------|-------------------------------|-----------------------------------------------------------------------------------------------------------------------------------------------------------------|------------------------------------------|-----|----------------|
|                      |                               | spindle pole fragmentation                                                                                                                                      |                                          |     |                |
| Astrin_oligo2        |                               |                                                                                                                                                                 | 224 cells from 2 independent experiments | yes |                |
| Aurora A_oligo1      | Centrosome; central spindle   | Misaligned chromosomes; mitotic delay; multipolar spindles; spindle pole fragmentation; chromosome mis-segregation (lagging chromosomes and chromosome bridges) | 364 cells from 2 independent experiments | yes | S103,S105-S108 |
| Aurora A_oligo2      |                               |                                                                                                                                                                 | 79 cells from 1 experiment               | yes |                |
| INCENP               | Centromere; spindle midzone   | Prometaphase delay; Multipolar spindles; cytokinesis defects                                                                                                    | 199 cells from 2 independent experiments | yes | S109,S110      |
| Haspin_oligo1        | Chromosome; centrosome        | Misaligned chromosomes; mitotic arrest; prometaphase delay; multipolar spindles; spindle pole fragmentation                                                     | 399 cells from 2 independent experiments | no  | S111,S112      |
| Haspin_oligo2        | Chromosome; centrosome        |                                                                                                                                                                 | 401 cells from 2 independent experiments | no  |                |
| ARP1                 | Kinetochores; mitotic spindle | Mitotic delay                                                                                                                                                   | 221 cells from 2 independent experiments | no  | S87            |
| Spc25_oligo1         | Kinetochores                  | Misaligned chromosomes; mitotic delay; aberrant mitotic spindles; multipolar spindles; cell death                                                               | 298 cells from 3 independent experiments | yes | S113-S115      |
| Spc25_oligo2         |                               |                                                                                                                                                                 | 203 cells from 2 independent experiments | yes |                |
| DYNLT3_oligo1        | kinetochores                  | Increased mitotic index, particularly the number of cells in prophase/prometaphase                                                                              | 309 cells from 2 independent experiments | no  | S116           |
| DYNLT3_oligo2        |                               |                                                                                                                                                                 | 564 cells from 3 independent experiments | no  |                |
| DYNLRB1/Road block-1 | Kinetochores; mitotic spindle | Misaligned chromosomes; prometaphase delay                                                                                                                      | 165 cells from 2 independent experiments | no  | S87            |
| Spc24_oligo1         | Kinetochores                  | Misaligned chromosomes                                                                                                                                          | 399 cells from 2 independent experiments | yes | S113,S114      |
| Spc24_oligo2         |                               |                                                                                                                                                                 | 336 cells from 2 independent experiments | yes |                |
| NdeL1                | Kinetochores; mitotic spindle | Misaligned chromosomes;                                                                                                                                         | 462 cells from 2                         | no  | S87,S117       |

|              |                                  |                                                                                                                                        |                                                   |     |                  |
|--------------|----------------------------------|----------------------------------------------------------------------------------------------------------------------------------------|---------------------------------------------------|-----|------------------|
|              |                                  | prometaphase delay;<br>chromosome mis-<br>segregation                                                                                  | independent<br>experiments                        |     |                  |
| LIS1/PFAH1B1 | Kinetochores;<br>mitotic spindle | Misaligned<br>chromosomes;<br>prometaphase delay;<br>chromosome mis-<br>segregation (lagging<br>chromosomes and<br>chromosome bridges) | 469 cells<br>from 3<br>independent<br>experiments | no  | S87,S118         |
| HSET/KIF1C   | Microtubules                     |                                                                                                                                        | 400 cells<br>from 2<br>independent<br>experiments | no  | S119             |
| Nde1         | Kinetochores;<br>mitotic spindle | Misaligned<br>chromosomes;<br>prometaphase delay;                                                                                      | 611 cells<br>from 3<br>independent<br>experiments | yes | S87,S117         |
| DLIC2        | Spindle pole                     | Misaligned<br>chromosomes;<br>prometaphase delay                                                                                       | 400 cells<br>from 2<br>independent<br>experiments | no  | S87,S120         |
| HAUS6_oligo1 | Centrosome,<br>spindle           | Misaligned<br>chromosomes; aberrant<br>mitotic spindles; spindle<br>pole fragmentation;<br>mitotic delay                               | 345 cells<br>from 2<br>independent<br>experiments | yes | S61              |
| HAUS6_oligo2 | Centrosome,<br>spindle           |                                                                                                                                        | 168 cells<br>from 1<br>experiment                 | yes |                  |
| HAUS1_oligo1 | Centrosome,<br>spindle           | Misaligned<br>chromosomes; aberrant<br>mitotic spindles; spindle<br>pole fragmentation;<br>mitotic delay                               | 400 cells<br>from 2<br>independent<br>experiments | no  | S61,S121         |
| HAUS1_oligo2 | Centrosome,<br>spindle           |                                                                                                                                        | 396 cells<br>from 2<br>independent<br>experiments | no  |                  |
| DIC2/DYNC112 | Kinetochores;<br>mitotic spindle | Misaligned<br>chromosomes;<br>prometaphase delay                                                                                       | 184 cells<br>from 2<br>independent<br>experiments | no  | S87              |
| survivin     | Centromeres;<br>spindle midzone  | Misaligned<br>chromosomes;<br>prometaphase delay;<br>chromosome<br>segregation errors;<br>Cytokinesis failure,<br>mitotic catastrophe  | 294 cells<br>from 2<br>independent<br>experiments | yes | S122-S124        |
| CPAP/ CENP-J | centriole                        | Misaligned<br>chromosomes; mitotic<br>delay; multipolar<br>spindles; apoptosis                                                         | 215 cells<br>from 2<br>independent<br>experiments | no  | S125             |
| Ndc80_oligo1 | kinetochores                     | Misaligned<br>chromosomes; mitotic<br>arrest                                                                                           | 191 cells<br>from 2<br>independent<br>experiments | yes | S3,S85,S126-S128 |
| Ndc80_oligo2 |                                  |                                                                                                                                        | 238 cells<br>from 2<br>independent<br>experiments | yes |                  |
| Borealin     | Centromere;<br>spindle midzone   |                                                                                                                                        | 368 cells<br>from 2<br>independent<br>experiments | no  | S129             |



|                |                                                               |                                                                                                                                  |                                                   |     |                |
|----------------|---------------------------------------------------------------|----------------------------------------------------------------------------------------------------------------------------------|---------------------------------------------------|-----|----------------|
| Scc1/Rad21     | Chromosome;<br>centrosome                                     | Misaligned<br>chromosomes;<br>prometaphase delay;<br>multipolar spindles;<br>spindle pole<br>fragmentation                       | 384 cells<br>from 2<br>independent<br>experiments | no  | S112,S130,S131 |
| Myosin 10      | Spindle pole                                                  | Misaligned<br>chromosomes; mitotic<br>delay; aberrant mitotic<br>spindles; spindle pole<br>fragmentation;<br>cytokinesis failure | 500 cells<br>from 3<br>independent<br>experiments | no  | S132           |
| Sgo1/Shugoshin | Centromere;<br>Kinetochore;<br>centrosome;<br>spindle pole    | Misaligned<br>chromosomes;<br>prometaphase delay;<br>spindle pole<br>fragmentation                                               | 414 cells<br>from 2<br>independent<br>experiments | no  | S133,S134      |
| HAUS3_oligo1   | Centrosome,<br>spindle                                        | Misaligned<br>chromosomes; aberrant<br>mitotic spindles; spindle<br>pole fragmentation;                                          | 400 cells<br>from 2<br>independent<br>experiments | no  | S61            |
| HAUS3_oligo2   | Centrosome,<br>spindle                                        |                                                                                                                                  | 400 cells<br>from 2<br>independent<br>experiments | no  |                |
| DHC/DYNC1H1    | Kinetochore;<br>mitotic spindle                               | Misaligned<br>chromosomes;<br>prometaphase delay;<br>aberrant mitotic spindles                                                   | 396 cells<br>from 2<br>independent<br>experiments | yes | S87,S93        |
| CENP-T         | kinetochore                                                   | Misaligned<br>chromosomes,<br>prometaphase arrest;<br>multipolar spindles; cell<br>death                                         | 395 cells<br>from 2<br>independent<br>experiments | no  | S135-S137      |
| CENP-T         |                                                               |                                                                                                                                  | 229 cells<br>from 2<br>independent<br>experiments | no  |                |
| MLL            | Mitotic spindle                                               | Misaligned<br>chromosomes; mitotic<br>delay                                                                                      | 560 cells<br>from 3<br>independent<br>experiments | no  | S138           |
| CENP-W         | kinetochore                                                   | Misaligned<br>chromosomes; mitotic<br>delay; multipolar<br>spindles                                                              | 380 cells<br>from 2<br>independent<br>experiments | no  | S136,S139      |
| Shp2_oligo1    | Kinetochore;<br>centrosome;<br>spindle<br>midzone;<br>midbody | Misaligned<br>chromosomes; mitotic<br>delay; chromosome<br>mis-segregation<br>(lagging chromosomes)                              | 528 cells<br>from 3<br>independent<br>experiments | yes | S140           |
| Shp2_oligo2    |                                                               |                                                                                                                                  | 455 cells<br>from 3<br>independent<br>experiments | yes |                |
| ASURA/PHB2     | cytoplasm                                                     | Misaligned<br>chromosomes; mitotic<br>arrest                                                                                     | 400 cells<br>from 2<br>independent<br>experiments | no  | S128,S141,S142 |
| CENP-H_oligo1  | kinetochore                                                   | Misaligned<br>chromosomes; aberrant<br>mitotic spindles;<br>multipolar spindles                                                  | 324 cells<br>from 3<br>independent<br>experiments | yes | S143,S144      |
| CENP-H_oligo2  |                                                               |                                                                                                                                  | 255 cells<br>from 2                               | yes |                |

|                 |                                              |                                                                                                                 |                                          |     |           |
|-----------------|----------------------------------------------|-----------------------------------------------------------------------------------------------------------------|------------------------------------------|-----|-----------|
|                 |                                              |                                                                                                                 | independent experiments                  |     |           |
| Kif14_oligo1    | Spindle poles; mitotic spindle; midbody      | Misaligned chromosomes; cytokinesis failure; binucleated cells                                                  | 436 cells from 3 independent experiments | no  | S145,S146 |
| Kif14_oligo2    | Spindle poles; mitotic spindle; midbody      |                                                                                                                 | 277 cells from 2 independent experiments | no  |           |
| WDR5            | Mitotic spindle                              | Misaligned chromosomes; mitotic delay                                                                           | 383 cells from 2 independent experiments | no  | S138      |
| TAO1/MARKK      | microtubules                                 | Misaligned chromosomes; prometaphase delay; Muli-lobed nuclei; chromosome mis-segregation (lagging chromosomes) | 416 cells from 2 independent experiments | no  | S147,S148 |
| Nup88           | Mitotic spindle                              | Misaligned chromosomes; multipolar spindles                                                                     | 300 cells from 2 independent experiments | no  | S149      |
| ASB7            | ND                                           | Misaligned chromosomes                                                                                          | 300 cells from 2 independent experiments | no  | S150      |
| And-1_oligo1    | cytoplasm                                    | Misaligned chromosomes; prometaphase delay                                                                      | 415 cells from 2 independent experiments | yes | S151      |
| And-1_oligo2    | cytoplasm                                    |                                                                                                                 | 168 cells from 1 experiment              | yes |           |
| Septin-7        | Spindle poles; mitotic spindle; midbody      | Misaligned chromosomes; mitotic arrest                                                                          | 222 cells from 2 independent experiments | no  | S152      |
| ANKRD53         | Spindle poles                                | Misaligned chromosomes; mitotic delay; Multinucleated cells                                                     | 360 cells from 2 independent experiments | no  | S153      |
| TRAMM           | Perinuclear region                           | Misaligned chromosomes; mitotic delay                                                                           | 371 cells from 2 independent experiments | no  | S154      |
| Septin-2_oligo1 | plasma membrane, cleavage furrow and midbody | Misaligned chromosomes; mitotic delay; binucleated cells                                                        | 411 cells from 2 independent experiments | yes | S155      |
| Septin-2_oligo2 |                                              |                                                                                                                 | 325 cells from 2 independent experiments | yes |           |
| Seh1            | kinetochores                                 | Misaligned chromosomes; mitotic delay; cytokinesis defects                                                      | 200 cells from 2 independent experiments | no  | S156,S157 |
| CENP-Q_oligo1   | kinetochore                                  | Misaligned chromosomes; prometaphase delay                                                                      | 430 cells from 3 independent experiments | no  | S158      |
| CENP-Q_oligo2   | kinetochore                                  |                                                                                                                 | 352 cells from 3                         | no  |           |

|               |                                                            |                                                                                              |                                            |     |           |
|---------------|------------------------------------------------------------|----------------------------------------------------------------------------------------------|--------------------------------------------|-----|-----------|
|               |                                                            |                                                                                              | independent experiments                    |     |           |
| NF-1          | Astral microtubules; mitotic spindle; centrosomes; midbody | Misaligned chromosomes                                                                       | 375 cells from 2 independent experiments   | no  | S159      |
| Scramble RNAi |                                                            |                                                                                              | 7229 cells from 45 independent experiments |     |           |
| Nup107        | kinetochore                                                | Misaligned chromosomes; mitotic delay; cytokinesis defects                                   | 428 cells from 3 independent experiments   | no  | S156,S157 |
| Usp16         | Cytoplasmic in interphase; kinetochore                     | Misaligned chromosomes; prometaphase delay                                                   | 663 cells from 3 independent experiments   | no  | S160      |
| NDR1          | ND                                                         | Misaligned chromosomes                                                                       | 264 cells from 2 independent experiments   | no  | S161      |
| GAK_oligo1    | Trans-Golgi network                                        | Misaligned chromosomes; prometaphase arrest; multipolar spindles; spindle pole fragmentation | 333 cells from 2 independent experiments   | yes | S162      |
| GAK_oligo2    | Trans-Golgi network                                        |                                                                                              | 376 cells from 3 independent experiments   | yes |           |
| HAUS7         | Centrosome, spindle                                        | Misaligned chromosomes; aberrant mitotic spindles; spindle pole fragmentation;               | 303 cells from 2 independent experiments   | no  | S61       |
| CENP-M        | kinetochore                                                | Misaligned chromosomes                                                                       | 599 cells from 3 independent experiments   | no  | S163,S164 |
| CENP-U        | kinetochore                                                | Misaligned chromosomes; chromosome mis-segregation (lagging chromosomes)                     | 278 cells from 3 independent experiments   | no  | S165      |
| MST1          | ND                                                         | Misaligned chromosomes; prometaphase delay; cell death                                       | 300 cells from 2 independent experiments   | no  | S161      |
| PTEN          | Centrosome; mitotic spindle; midbody                       | Misaligned chromosomes; mitotic delay; spindle pole fragmentation; mitotic catastrophe       | 280 cells from 2 independent experiments   | no  | S166      |
| HAUS2         | Centrosome, spindle                                        | Misaligned chromosomes; aberrant mitotic spindles; spindle pole fragmentation;               | 339 cells from 3 independent experiments   | no  | S61       |
| CENP-N_oligo1 | kinetochore                                                | Misaligned chromosomes, multipolar spindles                                                  | 300 cells from 2 independent experiments   | yes | S135      |
| CENP-N_oligo2 |                                                            |                                                                                              | 200 cells from 2                           | yes |           |

|                |                               |                                                                                                             |                                          |     |                |
|----------------|-------------------------------|-------------------------------------------------------------------------------------------------------------|------------------------------------------|-----|----------------|
|                |                               |                                                                                                             | independent experiments                  |     |                |
| Hsp72          | Mitotic spindle; midbody      | Misaligned chromosomes; prometaphase delay                                                                  | 428 cells from 3 independent experiments | no  | S167           |
| HAUS5          | Centrosome, spindle           | Misaligned chromosomes; aberrant mitotic spindles; spindle pole fragmentation;                              | 397 cells from 2 independent experiments | no  | S61            |
| HAUS4_oligo1   | Centrosome, spindle           | Misaligned chromosomes; aberrant mitotic spindles; spindle pole fragmentation;                              | 324 cells from 2 independent experiments | no  | S61            |
| HAUS4_oligo2   |                               |                                                                                                             | 254 cells from 2 independent experiments | no  |                |
| DYNLT1         | Kinetochores; mitotic spindle | ND                                                                                                          | 596 cells from 3 independent experiments | no  | S87            |
| Rab5           | Early endosomes               | Misaligned chromosomes; prometaphase delay                                                                  | 579 cells from 3 independent experiments | no  | S168           |
| CENP-I_oligo 1 | Kinetochores                  | Misaligned chromosomes, multipolar spindles; chromosome mis-segregation; apoptosis                          | 305 cells from 2 independent experiments | yes | S135,S169,S170 |
| CENP-I_oligo 2 |                               |                                                                                                             | 207 cells from 2 independent experiments | yes |                |
| Dsn1_oligo1    | Kinetochores                  | Misaligned chromosomes; prometaphase delay                                                                  | 582 cells from 3 independent experiments | yes | S171           |
| Dsn1_oligo2    |                               |                                                                                                             | 229 cells from 2 independent experiments | yes |                |
| CENP-P         | kinetochores                  | Misaligned chromosomes; mitotic delay                                                                       | 567 cells from 3 independent experiments | no  | S158           |
| Zwint          | Kinetochores                  | Misaligned chromosomes; cell death; chromosome mis-segregation (lagging chromosomes and chromosome bridges) | 410 cells from 2 independent experiments | no  | S172,S173      |
| Nsl1_oligo1    | Kinetochores                  | Misaligned chromosomes                                                                                      | 300 cells from 2 independent experiments | yes | S171           |
| Nsl1_oligo2    |                               |                                                                                                             | 200 cells from 2 independent experiments | yes |                |
| Mis12_oligo1   | Kinetochores                  | Misaligned chromosomes                                                                                      | 200 cells from 2 independent experiments | yes | S171           |

|              |              |                                              |                                          |     |           |
|--------------|--------------|----------------------------------------------|------------------------------------------|-----|-----------|
| Mis12_oligo2 |              |                                              | 171 cells from 2 independent experiments | yes |           |
| KNL1_oligo1  | Kinetochores | Misaligned chromosomes                       | 291 cells from 2 independent experiments | yes | S174,S175 |
| KNL1_oligo2  |              |                                              | 219 cells from 2 independent experiments | yes |           |
| Nup153       | ND           | Multilobed nuclei; cytokinesis abnormalities | 200 cells from 2 independent experiments | no  | S176-S178 |
