# Supplementary material for: Micronuclei from misaligned chromosomes that satisfy the spindle assembly checkpoint in cancer cells
Source: PubMed Central journal article supplement — Curr Biol. 2022 Oct 10;32(19):4240–4254.e5. doi: 10.1016/j.cub.2022.08.026 (PMC9559752; doi:10.1016/j.cub.2022.08.026), 2022-10-10
Supplement: mmc3.pdf [file mmc3.pdf]

## Data S2. siRNA oligonucleotide sequences, related to STAR Methods.

| Reagent type    | Designation                                         | Source or reference | References/ Identifiers | Additional information |
|-----------------|-----------------------------------------------------|---------------------|-------------------------|------------------------|
| Oligonucleotide | 5'-CUUCCUCUCUUUCUCUCCCUUGUGATT-3'<br>(scramble)     | Sigma-Aldrich       |                         |                        |
| Oligonucleotide | 5'-CCAGGACUACGAGGCGCUGTT-3'<br>(m-calpain)          | Sigma-Aldrich       | S179                    | 50nM, 96h              |
| Oligonucleotide | 5'-AAGCAUGCCGUGAAACGUAUATT-3'<br>(Nuf2_Oligo1)      | Sigma-Aldrich       | S1                      | 50nM, 24h              |
| Oligonucleotide | 5'-GCAUGCCGUGAAACGUAUATT-3'<br>(Nuf2_Oligo2)        | Dharmacon           | S180                    | 50nM, 24h              |
| Oligonucleotide | 5'-GCUCAGUAUCAGAGAGAAUTT-3'<br>(Beclin-1)           | Sigma-Aldrich       | S4                      | 50nM, 48h              |
| Oligonucleotide | 5'-GCACAGCUCUGAAGACACCTT-3'<br>(CLIP-170)           | Sigma-Aldrich       | S5                      | 50nM, 96h              |
| Oligonucleotide | 5'-GAGGAAACCUCAAUUGUATT-3'<br>(ATRX_Oligo1)         | Sigma-Aldrich       | S7                      | 50nM, 72h              |
| Oligonucleotide | 5'-GCAGAGAAAUUCCUAAAGATT-3'<br>(ATRX_Oligo2)        | Sigma-Aldrich       | S7                      | 50nM, 72h              |
| Oligonucleotide | 5'-GCUGAGAACAAGAGUCATT-3'<br>(SPICE)                | Sigma-Aldrich       | S8                      | 50nM, 48h              |
| Oligonucleotide | 5'-CCAGGAUAGCAAGCUCUCAATT-3'<br>(CHICA)             | Sigma-Aldrich       | S10                     | 50nM, 48h              |
| Oligonucleotide | 5'-GCUGCAUGGAAGAGCUGUUTT-3'<br>(CDCA4)              | Sigma-Aldrich       | S12                     | 50nM, 96h              |
| Oligonucleotide | 5'-GGAUUGGCAUCCUGUGAAATT-3'<br>(Kif2a_Oligo1)       | Sigma-Aldrich       | S13                     | 50nM, 72h              |
| Oligonucleotide | 5'-GGCAAAGAGAUUGACCGGTT-3'<br>(Kif2a_Oligo 2)       | Sigma-Aldrich       | S14                     | 50nM, 72h              |
| Oligonucleotide | 5'-UUCUCAUGAUGCGUGCCAGGAUGATT-3'<br>(HIP1r)         | Sigma-Aldrich       | S15                     | 50nM, 96h              |
| Oligonucleotide | 5'-AGAUGAUGAUGAUGAUUUTT-3'<br>(Nucleophosmin)       | Sigma-Aldrich       | S16                     | 50nM, 48h              |
| Oligonucleotide | 5'-AAGAGAAGACCCCAAGUCAUCTT-3'<br>(CENP-F)           | Sigma-Aldrich       | S17                     | 50nM, 72h              |
| Oligonucleotide | 5'-AACAGACUUUUUCAUUGGAGGTT-3'<br>(NudC)             | Sigma-Aldrich       | S19                     | 50nM, 48h              |
| Oligonucleotide | 5'-CUACCGACACCAGAGUAATT-3'<br>(RRS1)                | Sigma-Aldrich       | S21                     | 50nM, 72h              |
| Oligonucleotide | 5'-GGUUGGAGAUUACUUCUATT-3'<br>(KIBRA)               | Sigma-Aldrich       | S22                     | 50nM,96h               |
| Oligonucleotide | 5'-AGAGUUUGCUUCAUUCGAATT-3'<br>(Nucleolin)          | Sigma-Aldrich       | S23                     | 50nM, 96h              |
| Oligonucleotide | 5'-AAGCAAGACUUCAGUAGCATT-3'<br>(DDA3_Oligo1)        | Sigma-Aldrich       | S13                     | 50nM, 72h              |
| Oligonucleotide | 5'-CCACCGAAGTGACCCAAATTT-3'<br>(DDA3_Oligo 2)       | Sigma-Aldrich       | S13                     | 50nM, 24h              |
| Oligonucleotide | 5'-AAAUACCACAAUGACCCAAGATT-3'<br>(Bub1_oligo1)      | Sigma-Aldrich       | S29                     | 50nM, 48h              |
| Oligonucleotide | 5'-GAGUGAUCACGAUUUCUAUTT-3'<br>(Bub1_oligo2)        | Dharmacon           | S181                    | 50nM, 48h              |
| Oligonucleotide | 5'-AACGGGCAUUUGAAUAUGAAATT-3'<br>(BubR1_Oligo1)     | Sigma-Aldrich       | S32                     | 50nM, 48h              |
| Oligonucleotide | 5'-AAAGAUCCUGGCUAACUGUUCTT-3'<br>(BubR1_Oligo2)     | Dharmacon           | S33                     | 50nM, 48h              |
| Oligonucleotide | 5'-AAUCCAGGCUCAUGAUAAATT-3'<br>(Ska3_Oligo1)        | Sigma-Aldrich       | S34                     | 50nM, 24h              |
| Oligonucleotide | 5'-AGACAAACAUGAACAUUAATT-3'<br>(Ska3_Oligo2)        | Sigma-Aldrich       | S35                     | 50nM, 48h              |
| Oligonucleotide | 5'-AAGGAGAUACUCAAAAACAUAGTT-3'<br>(TPX2)            | Sigma-Aldrich       | S39                     | 50nM, 96h              |
| Oligonucleotide | 5'-AUUUCUAGCAGCAUGGACUGUCCCTT-3'<br>(Nup188_Oligo1) | Sigma-Aldrich       | S41                     | 50nM, 96h              |

|                 |                                                  |               |      |           |
|-----------------|--------------------------------------------------|---------------|------|-----------|
| Oligonucleotide | 5'-GGUAGUAGGCAGACCAAUATT-3'<br>(Nup188_Oligo2)   | Sigma-Aldrich | S182 | 50nM, 96h |
| Oligonucleotide | 5'-GCAAUUGAUUACCCAGUUATT-3'<br>(Kif4a_Oligo1)    | Sigma-Aldrich | S42  | 50nM, 96h |
| Oligonucleotide | 5'-GAAAGATCCTGGCTCAAGATT-3'<br>(Kif4a_Oligo2)    | Sigma-Aldrich | S42  | 50nM, 96h |
| Oligonucleotide | 5'-UGAUCAAUGUGCUGUUAATT-3'<br>(Zw10_Oligo1)      | Sigma-Aldrich | S183 | 50nM, 72h |
| Oligonucleotide | 5'-CCACGAAGUGAUGAAUUUATT-3'<br>(Zw10_Oligo2)     | Dharmacon     | S184 | 50nM, 48h |
| Oligonucleotide | 5'-CCAUAUGUGGCUACUACUGAAUUU-3'<br>(CENP-L)       | Sigma-Aldrich | S45  | 50nM, 96h |
| Oligonucleotide | 5'-AAGCACCAAGAAGCUGAGAAUTT-3'<br>(NUSAP1)        | Sigma-Aldrich | S46  | 50nM, 96h |
| Oligonucleotide | 5'-GAACUCUCGU AUGCUAAGATT-3'<br>(SAF-A)          | Sigma-Aldrich | S48  | 50nM, 24h |
| Oligonucleotide | 5'-GCCUGAUCUUCUCUCCATT-3'<br>(Tastin)            | Sigma-Aldrich | S49  | 50nM, 96h |
| Oligonucleotide | 5'-AACAAUUCACCGUCGUCCUCUTT-3'<br>(Tankyrase-1)   | Sigma-Aldrich | S50  | 50nM, 72h |
| Oligonucleotide | 5'-CCCGCUAACCUAUAAUCAATT-3'<br>(Ska1_Oligo1)     | Sigma-Aldrich | S52  | 50nM, 48h |
| Oligonucleotide | 5'-GGACUUACUCGUUAUGUUATT-3'<br>(Ska1_Oligo2)     | Dharmacon     | S185 | 50nM, 24h |
| Oligonucleotide | 5'-AAUGACUCGAUCAGCUACUCATT-3'<br>(HURP_oligo1)   | Sigma-Aldrich | S54  | 50nM, 48h |
| Oligonucleotide | 5'-UACUUUGAAUUCACAAACUAATT-3'<br>(HURP-oligo2)   | Dharmacon     | S76  | 50nM, 48h |
| Oligonucleotide | 5'-CCCUGGCGAUCUGGAUGUCUUUGUU-3'<br>(Aki)         | Sigma-Aldrich | S58  | 50nM, 96h |
| Oligonucleotide | 5'-GAAAGUCUGUGUAGAACAUUU-3'<br>(4.1r)            | Sigma-Aldrich | S59  | 50nM, 72h |
| Oligonucleotide | 5'-GGGAGAACUUGAUGUUGGUGAUUCGTT-3'<br>(HICE1)     | Sigma-Aldrich | S60  | 50nM, 48h |
| Oligonucleotide | 5'-AAGAAUCAAGACUAAUCAUCTT-3'<br>(Ska2)           | Sigma-Aldrich | S52  | 50nM, 72h |
| Oligonucleotide | 5'-ACCAACAACAGUGCCAUAATT-3'<br>(Kif18a_oligo 1)  | Sigma-Aldrich | S62  | 50nM, 24h |
| Oligonucleotide | 5'-ACAGAUUCGUGAUCUCUUATT-3'<br>(Kif18a_oligo 2)  | Dharmacon     | S66  | 50nM, 24h |
| Oligonucleotide | 5'-CACGGGCGCGGAGGUGGAUUATT-3'<br>(TACC3_Oligo1)  | Sigma-Aldrich | S186 | 50nM, 48h |
| Oligonucleotide | 5'-GUUACCGGAAGAUCGUCUGTT-3'<br>(TACC3_Oligo2)    | Dharmacon     | S68  | 50nM, 48h |
| Oligonucleotide | 5'-GGAGAAAGAUUGGAGACGAUTT-3'<br>(CLERC_Oligo1)   | Sigma-Aldrich | S73  | 50nM, 24h |
| Oligonucleotide | 5'-CAGAUAGGCUAAAGGAAUTT-3'<br>(CLERC_Oligo2)     | Sigma-Aldrich | S73  | 50nM, 72h |
| Oligonucleotide | 5'-AAGCGAUUUGAGCGUGUCCAATT-3'<br>(Kizuna)        | Sigma-Aldrich | S74  | 50nM, 72h |
| Oligonucleotide | 5'-AAGACGCUCAGCAGACAUGUGGATT-3'<br>(ILK)         | Sigma-Aldrich | S186 | 50nM, 96h |
| Oligonucleotide | 5'-AGGCUACAAACCACUGAGUAATT-3'<br>(Kinastrin)     | Sigma-Aldrich | S76  | 50nM, 96h |
| Oligonucleotide | 5'-UAUGAGCAUUGAGGCAGAGTT-3'<br>(Ninein)          | Sigma-Aldrich | S80  | 50nM, 96h |
| Oligonucleotide | 5'-GGCGUGGCAGGAGAAGUUCTT-3'<br>(NuMA)            | Sigma-Aldrich | S80  | 50nM, 96h |
| Oligonucleotide | 5'-GCAGUAACCAAGCGAUACATT-3'<br>(Rae1_Oligo1)     | Sigma-Aldrich | S83  | 50nM, 72h |
| Oligonucleotide | 5'-GAGUUGCUAUUCACUAUAUTT-3'<br>(Rae1_Oligo2)     | Sigma-Aldrich | S84  | 50nM, 48h |
| Oligonucleotide | 5'-AAGGACAGUGGGAUUGUAGUGTT-3'<br>(RanBP2_Oligo1) | Sigma-Aldrich | S85  | 50nM, 72h |

|                 |                                                    |               |                        |           |
|-----------------|----------------------------------------------------|---------------|------------------------|-----------|
| Oligonucleotide | 5'-AACAAACACCAAAGCAGUGGUTT-3'<br>(RanBP2_Oligo2)   | Sigma-Aldrich | S85                    | 50nM, 72h |
| Oligonucleotide | 5'-GAAAGGGUCUCAACUGAATT-3'<br>(Spindly)            | Sigma-Aldrich | S86                    | 50nM, 48h |
| Oligonucleotide | 5'-GAGUUGCCAAAGGCUUAUATT-3'<br>(STARD9)            | Sigma-Aldrich | S187                   | 50nM, 72h |
| Oligonucleotide | 5'-GCAGAUGCCAGCCACUGUATT-3'<br>(CAMKII $\gamma$ )  | Sigma-Aldrich | SASI_Hs01_0<br>0118118 | 50nM, 24h |
| Oligonucleotide | 5'-GAACUAAGAAGAAGCGUAUTT-3'<br>(CENP-E_Oligo1)     | Sigma-Aldrich | S90                    | 50nM, 24h |
| Oligonucleotide | 5'-AAGGCUACAAUGGUACUAUATT-3'<br>(CENP-E_Oligo2)    | Dharmacon     | S29                    | 50nM, 24h |
| Oligonucleotide | 5'-AAGCAAUGAGCUGUUUGAAGATT-3'<br>(CHC17 clatrin)   | Sigma-Aldrich | S188                   | 50nM, 96h |
| Oligonucleotide | 5'-UUGCAGAU CGCUGGACUUCAATT-3'<br>(CEP72_Oligo1)   | Sigma-Aldrich | S96                    | 50nM, 72h |
| Oligonucleotide | 5'-GAGUUUAACAGGUCUGAAATT-3'<br>(CEP72_Oligo2)      | Sigma-Aldrich | SASI_Hs02_0<br>0351368 | 50nM, 96h |
| Oligonucleotide | 5'-GCAGCUGACAGACAUUATT-3'<br>(CEP90_Oligo1)        | Sigma-Aldrich | S97                    | 50nM, 48h |
| Oligonucleotide | 5'-CACCUUAGAGCAAACUGUUTT-3'<br>(CEP90_Oligo2)      | Sigma-Aldrich | SASI_HS01_0<br>0230208 | 50nM, 96h |
| Oligonucleotide | 5'-GGAUGAUUUACAAGACUGGTT-3'<br>(CLASP1b)           | Sigma-Aldrich | S98                    | 50nM, 48h |
| Oligonucleotide | 5'-GACAUACAUGGGUCUUAGATT-3'<br>(CLASP2b)           | Sigma-Aldrich | S98                    | 50nM, 48h |
| Oligonucleotide | 5'-AACGCGGCACUUCACAAUUGATT-3'<br>(Aurora B_Oligo1) | Sigma-Aldrich | S101                   | 50nM, 24h |
| Oligonucleotide | 5'-AAGGUGAUGGAGAAUAGCAGUTT-3'<br>(Aurora B_Oligo2) | Dharmacon     | S102                   | 50nM, 48h |
| Oligonucleotide | 5'-UCCCCACAACUCACAGAGAAATT-3'<br>(Astrin_Oligo1)   | Sigma-Aldrich | S104                   | 50nM, 48h |
| Oligonucleotide | 5'-CUACAGAGCCUGACUCUCUTT-3'<br>(Astrin_Oligo2)     | Dharmacon     | S189                   | 50nM, 48h |
| Oligonucleotide | 5'-AUGCCCUGUCUUACUGUCATT-3'<br>(Aurora A_Oligo1)   | Sigma-Aldrich | S190                   | 50nM, 24h |
| Oligonucleotide | 5'-AUGCCCUGUCUUACUGUCATT-3'<br>(Aurora A_Oligo2)   | Dharmacon     | S191                   | 50nM, 24h |
| Oligonucleotide | 5'-CUCAGAAGAACCGACGGAATT-3'<br>(INCENP)            | Sigma-Aldrich | SASI_Hs01_0<br>0219348 | 50nM, 24h |
| Oligonucleotide | 5'-GGCUUUAUCGGGCUGAACUTT-3'<br>(Haspin_Oligo1)     | Sigma-Aldrich | SASI_Hs02_0<br>0359157 | 50nM, 48h |
| Oligonucleotide | 5'-GCUUUGAGCACCGAGACUUTT-3'<br>(Haspin_Oligo2)     | Sigma-Aldrich | SASI_Hs01_0<br>0243245 | 50nM, 72h |
| Oligonucleotide | 5'-CCUUCAAUGUGCCCGCUCUTT-3'<br>(ARP1)              | Sigma-Aldrich | SASI_Hs01_0<br>0015229 | 50nM, 48h |
| Oligonucleotide | 5'-CUGCAAAUAUCCAGGAUCUTT-3'<br>(Spc25_Oligo1)      | Sigma-Aldrich | SASI_Hs01_0<br>0193697 | 50nM, 24h |
| Oligonucleotide | 5'-AAGCGAAUGCAGAGAGGUUGATT-3'<br>(Spc25_Oligo2)    | Dharmacon     | S115                   | 50nM, 24h |
| Oligonucleotide | 5'-CAUAGUAAUUGGCAGAUUATT-3'<br>(DYNLT3_Oligo1)     | Sigma-Aldrich | SASI_Hs01_0<br>0147343 | 50nM, 96h |
| Oligonucleotide | 5'-GGGAGAACCGGACCAUGAATT-3'<br>(DYNLT3_Oligo2)     | Sigma-Aldrich | SASI_Hs02_0<br>0341758 | 50nM, 72h |
| Oligonucleotide | 5'-GAUUCAGAAUCCAACCGAATT-3'<br>(DYNLRB1)           | Sigma-Aldrich | SASI_Hs01_0<br>0158744 | 50nM, 48h |
| Oligonucleotide | 5'-CUCAACUUUACCACCAAGUUATT-3'<br>(Spc24_Oligo1)    | Sigma-Aldrich | S113                   | 50nM, 48h |
| Oligonucleotide | 5'-AAGGAGAUUGAGCGGAUCUGTT-3'<br>(Spc24_Oligo2)     | Dharmacon     | S115                   | 50nM, 48h |
| Oligonucleotide | 5'-GGAUGAAGCAAGAGAUUUATT-3'<br>(NdeL1)             | Sigma-Aldrich | SASI_Hs01_0<br>0228104 | 50nM, 48h |
| Oligonucleotide | 5'-GAGACAAGACUAUUAAGAUUTT-3'<br>(LIS1)             | Sigma-Aldrich | SASI_Hs01_0<br>0019092 | 50nM, 48h |

|                 |                                                    |               |                        |           |
|-----------------|----------------------------------------------------|---------------|------------------------|-----------|
| Oligonucleotide | 5'-CAGCUAUUGCCACAGGGUUTT-3'<br>(HSET)              | Sigma-Aldrich | SASI_Hs01_0<br>0185148 | 50nM, 48h |
| Oligonucleotide | 5'-GCUUGAAUCAGGCCAUCGATT-3'<br>(Nde1)              | Sigma-Aldrich | SASI_Hs01_0<br>0074363 | 50nM, 48h |
| Oligonucleotide | 5'-GAUGCAUAUGAAGACUUUATT-3'<br>(DLIC2)             | Sigma-Aldrich | SASI_Hs01_0<br>0014533 | 50nM, 72h |
| Oligonucleotide | 5'-CCAUUUCGCACGUAGCAGATT-3'<br>(HAUS6_Oligo1)      | Sigma-Aldrich | SASI_Hs01_0<br>0105872 | 50nM, 48h |
| Oligonucleotide | 5'-CUAAUUGACUCUCUGGGUUTT-3'<br>(HAUS6_Oligo2)      | Sigma-Aldrich | SASI_Hs01_0<br>0105873 | 50nM, 48h |
| Oligonucleotide | 5'-GUAUCUGAAUGCUUUGGUUTT-3'<br>(HAUS1_Oligo1)      | Sigma-Aldrich | SASI_Hs01_0<br>0107510 | 50nM, 48h |
| Oligonucleotide | 5'-AAGGAUACCUCGCUAGCUAGUTT-3'<br>(HAUS1_Oligo2)    | Sigma-Aldrich | S121                   | 50nM, 48h |
| Oligonucleotide | 5'-GAAACUCAGACUCCAGUUATT-3'<br>(DIC2)              | Sigma-Aldrich | SASI_Hs01_0<br>0129736 | 50nM, 48h |
| Oligonucleotide | 5'-CAGACUUGGCCCAGUGUUUTT-3'<br>(survivin)          | Sigma-Aldrich | SASI_Hs01_0<br>0052228 | 50nM, 24h |
| Oligonucleotide | 5'-GAUUUACGGGAAGAUUUGATT-3'<br>(CPAP)              | Sigma-Aldrich | SASI_Hs01_0<br>0069692 | 50nM, 96h |
| Oligonucleotide | 5'-GAAUUGCAGCAGACUAAUATT-3'<br>(Ndc80_Oligo1)      | Sigma-Aldrich | SASI_Hs01_0<br>0138654 | 50nM, 24h |
| Oligonucleotide | 5'-AAGUUCAAAAGCUGGAUGAUCTT-3'<br>(Ndc80_Oligo2)    | Dharmacon     | S192                   | 50nM, 24h |
| Oligonucleotide | 5'-CCUCUAAGGGAAUUCAGGATT-3'<br>(Borealin)          | Sigma-Aldrich | SASI_Hs01_0<br>0153657 | 50nM, 48h |
| Oligonucleotide | 5'-CUACUACUUCUACCCUCCUTT-3'<br>(Scc1/Rad21)        | Sigma-Aldrich | SASI_Hs01_0<br>0195799 | 50nM, 48h |
| Oligonucleotide | 5'-GCAAUACAGUGGGACAGUUTT-3'<br>(Myosin10)          | Sigma-Aldrich | SASI_Hs01_0<br>0072460 | 50nM, 96h |
| Oligonucleotide | 5'-GCUGCACCAUGCCAAAUAATT-3'<br>(Sgo1)              | Sigma-Aldrich | SASI_Hs01_0<br>0168960 | 50nM, 24h |
| Oligonucleotide | 5'-GAGAAUGCCCAGUUAUUGATT-3'<br>(HAUS3)             | Sigma-Aldrich | SASI_Hs01_0<br>0073692 | 50nM, 48h |
| Oligonucleotide | 5'-GAUUAAGGCUGUUAGUCUUTT-3'<br>(HAUS3)             | Sigma-Aldrich | SASI_Hs01_0<br>0073693 | 50nM, 48h |
| Oligonucleotide | 5'-GAACUAGACUUGGUUAAUUTT-3'<br>(DHC)               | Sigma-Aldrich | SASI_Hs01_0<br>0028998 | 50nM, 24h |
| Oligonucleotide | 5'-CAGUAGUGGCCAGGCUUCATT-3'<br>(CENP-T_Oligo1)     | Sigma-Aldrich | S193                   | 50nM, 48h |
| Oligonucleotide | 5'-AAGUAGAGCCCUACACGATT-3'<br>(CENP-T_Oligo 2)     | Dharmacon     | S194                   | 50nM, 24h |
| Oligonucleotide | 5'-GGAUGAAGUUAGAGAAAAUTT-3'<br>(MLL)               | Sigma-Aldrich | S138                   | 50nM, 24h |
| Oligonucleotide | 5'-CAGAUAAAGCGGAAGGCUCTT-3'<br>(CENP-W)            | Sigma-Aldrich | S139                   | 50nM, 72h |
| Oligonucleotide | 5'-AAGGUGAAUUAUGGCCUGUCTT-3'<br>(Shp2_Oligo1)      | Sigma-Aldrich | S140                   | 50nM, 48h |
| Oligonucleotide | 5'-GGUUGCUACGGCUUAUCAUTT-3'<br>(Shp2_Oligo2)       | Sigma-Aldrich | S195                   | 50nM, 72h |
| Oligonucleotide | 5'-GAAUCGUUAUCUACUCACATT-3'<br>(ASURA/PHB2)        | Sigma-Aldrich | S141                   | 50nM, 24h |
| Oligonucleotide | 5'-UGGUUGAUGCAAGUGAAGATT-3'<br>(CENP-H_Oligo1)     | Sigma-Aldrich | S143                   | 50nM, 48h |
| Oligonucleotide | 5'-AGAUUGAUUUGGACAGUAUTT-3'<br>(CENP-H_Oligo2)     | Dharmacon     | S194                   | 50nM, 48h |
| Oligonucleotide | 5'-GUUGGCUAGAAUUGGAAATT-3'<br>(Kif14_Oligo1)       | Sigma-Aldrich | S145                   | 50nM, 48h |
| Oligonucleotide | 5'-GGCUCAGCAAGAGCUUUCUUCUAATT-3'<br>(Kif14_Oligo2) | Sigma-Aldrich | S196                   | 50nM, 48h |
| Oligonucleotide | 5'-UUAGCAGUCACUCUCCACTT-3'<br>(WDR5)               | Sigma-Aldrich | S138                   | 50nM, 48h |
| Oligonucleotide | 5'-CTAAGAGTTTGAAGTCTAATT-3'<br>(TAO1)              | Sigma-Aldrich | S147                   | 50nM, 72h |

|                 |                                                      |               |                        |           |
|-----------------|------------------------------------------------------|---------------|------------------------|-----------|
| Oligonucleotide | 5'-UGCUUUGUUGAACACAUCCTT-3'<br>(Nup88)               | Sigma-Aldrich | S197                   | 50nM, 72h |
| Oligonucleotide | 5'-GAGAGAGGUCAAGCUGUGUGATT-3'<br>(ASB7)              | Sigma-Aldrich | S150                   | 50nM, 96h |
| Oligonucleotide | 5'-AAGATGGTCAAGAAGGCAGCATT-3'<br>(And-1_Oligo1)      | Sigma-Aldrich | S198                   | 50nM, 72h |
| Oligonucleotide | 5'-GAUGGUCAAGAAGGCAGCATT-3'<br>(And-1_Oligo2)        | Sigma-Aldrich | S199                   | 50nM, 72h |
| Oligonucleotide | 5'-ACGACUACAUUGAUAGUAAATT-3'<br>(Septin-7)           | Sigma-Aldrich | S152                   | 50nM, 96h |
| Oligonucleotide | 5'-ACCUUGAUACUCAAUCAGGTT-3'<br>(ANKRD53)             | Sigma-Aldrich | S153                   | 50nM, 96h |
| Oligonucleotide | 5'-CGGACAAGCUGAACGAACATT-3'<br>(TRAMM)               | Sigma-Aldrich | S154                   | 50nM, 24h |
| Oligonucleotide | 5'-AAGGUGAAUUAUUGUGCCUGUCTT-3'<br>(Septin-2_Oligo1)  | Sigma-Aldrich | S155                   | 50nM, 48h |
| Oligonucleotide | 5'-GGUGAAUUAUUGUGCCUGUCTT-3'<br>(Septin-2_Oligo2)    | Sigma-Aldrich | S200                   | 50nM, 24h |
| Oligonucleotide | 5'-AAGACACAUAGUGGAUCUGUAUGTT-3'<br>(Seh1)            | Sigma-Aldrich | S156                   | 50nM, 48h |
| Oligonucleotide | 5'-GGUCUGGCAUUACUACAGGAAGAAATT-3'<br>(CENP-Q_Oligo1) | Sigma-Aldrich | S158                   | 50nM, 72h |
| Oligonucleotide | 5'-CAGAGUAAUGACUGGGAAUUAUUCATT-3'<br>(CENP-Q_Oligo2) | Sigma-Aldrich | S158                   | 50nM, 72h |
| Oligonucleotide | 5'-AACUUCGGAAUUCUGCCUCUGTT-3'<br>(NF-1)              | Sigma-Aldrich | S201                   | 50nM, 48h |
| Oligonucleotide | 5'-AAGAGGAAAGUGUAUUCGCAGTT-3'<br>(Nup107)            | Sigma-Aldrich | S156                   | 50nM, 48h |
| Oligonucleotide | 5'-UAGUGAAUGUGGAAUGGAATT-3'<br>(Usp16)               | Sigma-Aldrich | S202                   | 50nM, 48h |
| Oligonucleotide | 5'-GAGCAGGTTGGCCACATTCTT-3'<br>(NDR1)                | Sigma-Aldrich | S161                   | 50nM, 96h |
| Oligonucleotide | 5'-GAUGUGCGGUUGUUCUGGTT-3'<br>(GAK_Oligo1)           | Sigma-Aldrich | S162                   | 50nM, 48h |
| Oligonucleotide | 5'-AAGCUCAAGAUGUGGGGAGUG-3'<br>(GAK_Oligo2)          | Sigma-Aldrich | S203                   | 50nM, 72h |
| Oligonucleotide | 5'-GCGCUUAGAACGGAGUACUTT-3'<br>(HAUS7)               | Sigma-Aldrich | SASI_Hs02_0<br>0350136 | 50nM, 48h |
| Oligonucleotide | 5'-GAAUUGACCUGAUCGUGUUTT-3'<br>(CENP-M)              | Sigma-Aldrich | SASI_Hs01_0<br>0144699 | 50nM, 72h |
| Oligonucleotide | 5'-CUUUUAAAUCAAUUGUUUTT-3'<br>(CENP-U)               | Sigma-Aldrich | SASI_Hs01_0<br>0175574 | 50nM, 96h |
| Oligonucleotide | 5'-GACGUGUGCGGGAGAGUGATT-3'<br>(MST1)                | Sigma-Aldrich | SASI_Hs01_0<br>0161455 | 50nM, 48h |
| Oligonucleotide | 5'-GGUGUAAUGAUUGUGCAUTT-3'<br>(PTEN)                 | Sigma-Aldrich | SASI_Hs01_0<br>0196478 | 50nM, 96h |
| Oligonucleotide | 5'-CUUUAGCAAAGAUGGAUAUTT-3'<br>(HAUS2)               | Sigma-Aldrich | SASI_Hs01_0<br>0101146 | 50nM, 96h |
| Oligonucleotide | 5'-GACUGUUGCUGAGUUCAUCTT-3'<br>(CENP-N_Oligo1)       | Sigma-Aldrich | SASI_Hs02_0<br>0322304 | 50nM, 72h |
| Oligonucleotide | 5'-GCGUGCAAGUAUCAGUGAUTT-3'<br>(CENP-N_Oligo2)       | Dharmacon     | S204                   | 50nM, 48h |
| Oligonucleotide | 5'-CCGAGAAGGACGAGUUUGATT-3'<br>(Hsp72)               | Sigma-Aldrich | SASI_Hs01_0<br>0051449 | 50nM, 72h |
| Oligonucleotide | 5'-GACAUGGAGAGGAAAGCCATT-3'<br>(HAUS5)               | Sigma-Aldrich | SASI_Hs02_0<br>0347509 | 50nM, 48h |
| Oligonucleotide | 5'-GGAAGUUCAUCGUCUGAUUTT-3'<br>(HAUS4_Oligo1)        | Sigma-Aldrich | SASI_Hs01_0<br>0022834 | 50nM, 48h |
| Oligonucleotide | 5'-GUGCUAUGAUCCUUAAGCUTT-3'<br>(HAUS4_Oligo2)        | Sigma-Aldrich | SASI_Hs01_0<br>0022835 | 50nM, 48h |
| Oligonucleotide | 5'-CCAUGAAUUCAGUGAACUCTT-3'<br>(DYNLT1)              | Sigma-Aldrich | SASI_Hs01_0<br>0096434 | 50nM, 48h |
| Oligonucleotide | 5'-GUCCUAUGCAGAUGACAAUTT-3'<br>(Rab5)                | Sigma-Aldrich | SASI_Hs01_0<br>0097508 | 50nM, 48h |

|                 |                                                  |                   |                                                                   |           |
|-----------------|--------------------------------------------------|-------------------|-------------------------------------------------------------------|-----------|
| Oligonucleotide | 5'-AAGCAACUCGAAGAACAUCUCTT-3'<br>(CENP-I_Oligo1) | Sigma-<br>Aldrich | S169                                                              | 50nM, 72h |
| Oligonucleotide | 5'-GAAGGUGUGUGACAUAUAUATT-3'<br>(CENP-I_Oligo2)  | Dharmacon         | S194                                                              | 50nM, 24h |
| Oligonucleotide | 5'-GUCUAUCAGUGUCGAUUUATT-3'<br>(Dsn1_Oligo1)     | Sigma-<br>Aldrich | S194                                                              | 50nM, 48h |
| Oligonucleotide | 5'-GGCGUUUCAGAGGAAAGAATT-<br>3'(Dsn1_Oligo2)     | Dharmacon         | S205                                                              | 50nM, 24h |
| Oligonucleotide | 5'-GAACCCUGGUAGGACUGCUUGGAAUTT-3'<br>(CENP-P)    | Sigma-<br>Aldrich | S45                                                               | 50nM, 72h |
| Oligonucleotide | 5'-GGAGGACACUGCUAAGGGUTT-3'<br>(Zwint)           | Sigma-<br>Aldrich | S206                                                              | 50nM, 72h |
| Oligonucleotide | 5'-CAUGAGCUCUUUCUGUUUATT-3'<br>(Nsl1_Oligo1)     | Sigma-<br>Aldrich | S194                                                              | 50nM, 48h |
| Oligonucleotide | Nsl1_Oligo2                                      | Dharmacon         | ON-<br>TARGETplus<br>Human NSL1<br>siRNA;<br>J-016722-05-<br>0002 | 50nM, 48h |
| Oligonucleotide | 5'-GAAUCAUAAGGACUGUUCATT-3'<br>(Mis12_Oligo1)    | Sigma-<br>Aldrich | SASI_Hs01_0<br>0050622                                            | 50nM, 48h |
| Oligonucleotide | 5'-GGACAUUUUGAUAAACCUUUTT-3'<br>(Mis12_Oligo2)   | Dharmacon         | S207                                                              | 50nM, 72h |
| Oligonucleotide | 5'-GCAUGUAUCUCUUAAGGAATT-3'<br>(KNL1_Oligo1)     | Sigma-<br>Aldrich | S208                                                              | 50nM, 24h |
| Oligonucleotide | 5'-GGAAUCCAAUGCUUUGAGATT-<br>3'(KNL1_Oligo2)     | Dharmacon         | doi.org/10.108<br>3/jcb.2010010<br>06                             | 50nM, 24h |
| Oligonucleotide | 5'-AAGGCAGACUCUACCAAUGUTT-<br>3'(Nup153)         | Sigma-<br>Aldrich | S209                                                              | 50nM, 48h |
