# Supplementary material for: Micronuclei from misaligned chromosomes that satisfy the spindle assembly checkpoint in cancer cells
Source: PubMed Central journal article supplement — Curr Biol. 2022 Oct 10;32(19):4240–4254.e5. doi: 10.1016/j.cub.2022.08.026 (PMC9559752; doi:10.1016/j.cub.2022.08.026), 2022-10-10

**Data S3. Analysis of RNAi-mediated depletion efficiency by Western blot, related to Figure 2, Figure 6 and STAR Methods.**

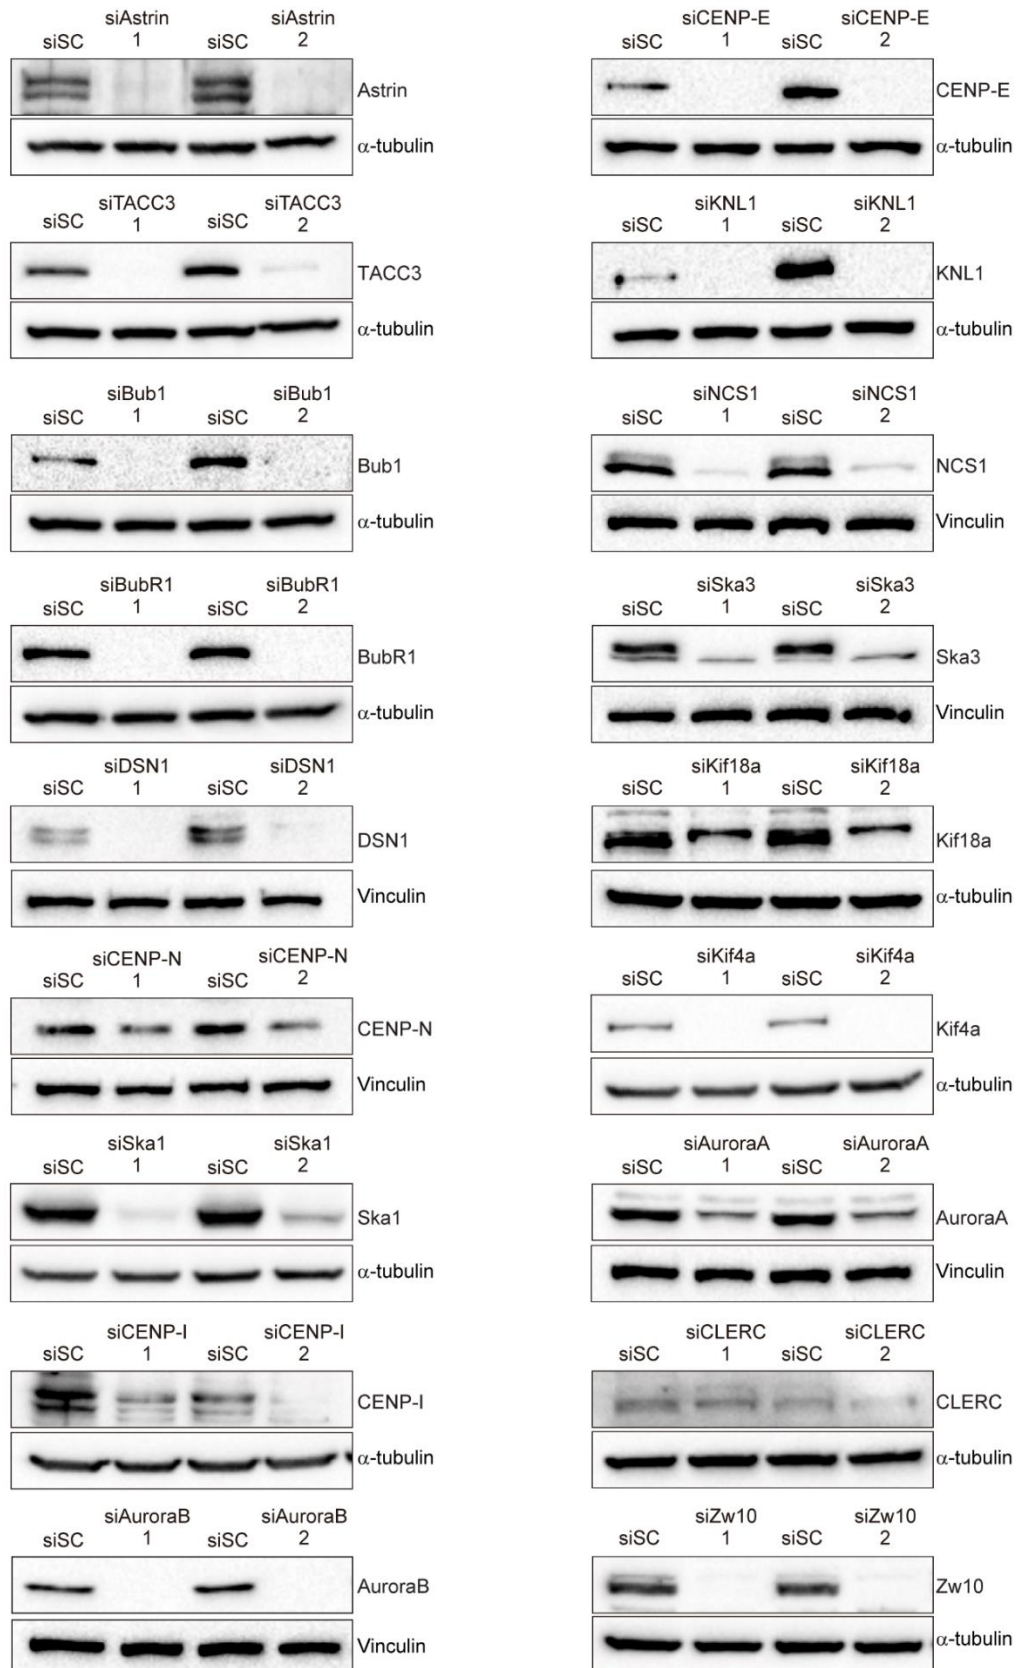

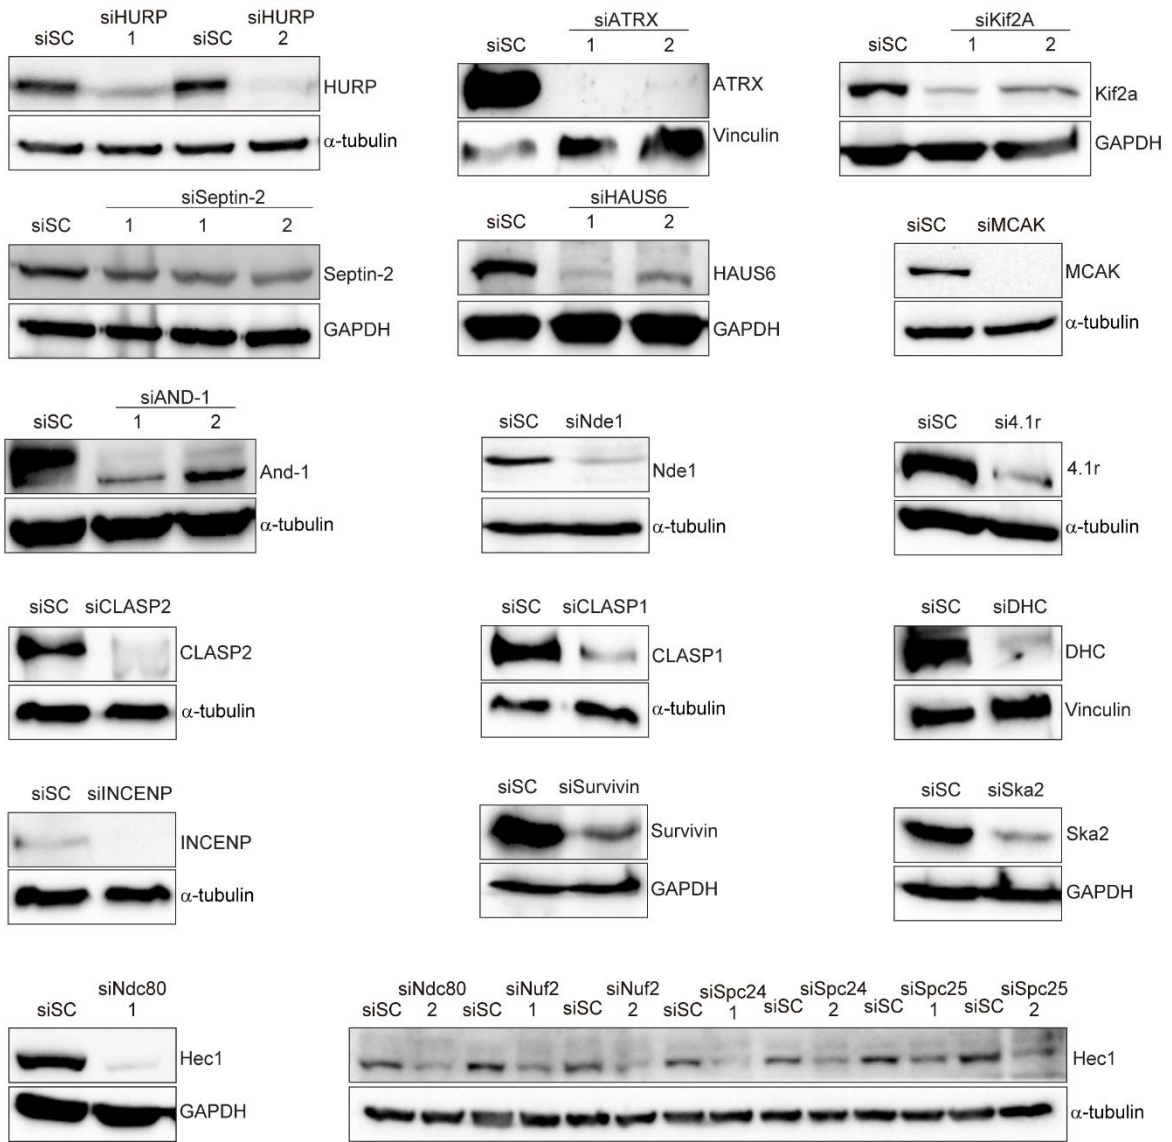

Supplement: mmc4.pdf [file mmc4.pdf]
